# Supplementary material for: Hydromagnesite sheets impregnated with cobalt–ferrite magnetic nanoparticles as heterogeneous catalytic system for the synthesis of imidazo[1,2-a]pyridine scaffolds
Source: Royal Society of Chemistry journal article supplement (doi:10.1039/d1ra02516c), 2021-01-01
Supplement: d1ra02516c1.pdf [file d1ra02516c1.pdf]

## Hydromagnesite Sheets Impregnated with Cobalt-Ferrite Magnetic Nanoparticles as Heterogeneous Catalytic System Leading to the Synthesis of Imidazo[1,2-*a*]pyridine Scaffolds

Deepika Geedkar,<sup>a</sup> Ashok Kumar,<sup>a</sup> Kranti Kumar,<sup>b</sup> and Pratibha Sharma<sup>a\*</sup>

<sup>a</sup> School of Chemical Sciences, Devi Ahilya University, Indore-452001 (M.P.) India

<sup>b</sup> UGC-DAE, Consortium for Scientific Research, Devi Ahilya University, Indore-452001 (M.P.) India

\*Corresponding author E-mail: drpratibhasharma@yahoo.com

---

## Table of Contents

|                                                                                                                                                                                                                                                 |       |
|-------------------------------------------------------------------------------------------------------------------------------------------------------------------------------------------------------------------------------------------------|-------|
| ❖ Correlation between catalytic activity and reaction efficiency for the synthesis of 3-benzyl-2-phenyl imidazo[1,2- <i>a</i> ]pyridine ( <i>4a</i> ).....                                                                                      | 03    |
| ❖ Comparison of catalytic activity of different catalysts on the model reaction for the synthesis of 3-benzyl-2-phenylimidazo[1,2- <i>a</i> ]pyridine ( <i>4a</i> ).....                                                                        | 03    |
| ❖ Recycling and reusability of magnetic nanocomposite and solvent.....                                                                                                                                                                          | 04    |
| ❖ Characterization of recovered CoFe <sub>2</sub> O <sub>4</sub> -HMS magnetic nanocatalyst.....                                                                                                                                                | 04-05 |
| ❖ Heterogeneous nature of CoFe <sub>2</sub> O <sub>4</sub> -HMS magnetic nanocatalyst.....                                                                                                                                                      | 05    |
| ❖ FTIR Analyses.....                                                                                                                                                                                                                            | 06    |
| ❖ Raman Analyses.....                                                                                                                                                                                                                           | 06    |
| ❖ Surface Basic Property (Temperature Programmed Desorption of CO <sub>2</sub> (CO <sub>2</sub> -TPD)).....                                                                                                                                     | 06    |
| ❖ Figure S1-S22. The spectrums of imidazo[1,2- <i>a</i> ]pyridine derivatives ( <i>4a-j</i> ) .....                                                                                                                                             | 07-28 |
| ❖ The Calculation of Eco-scale, E-factor, mass intensity, atom economy, reaction mass efficiency and carbon efficiency for the reaction of 2-amino-4methyl pyridine, 4-chlorobenzaldehyde and phenyl acetylene, in the presence of PEG 400..... | 29-31 |

❖ Correlation between catalytic activity and reaction efficiency for the synthesis of 3-benzyl-2-phenyl imidazo[1,2-*a*]pyridine (**4a**)

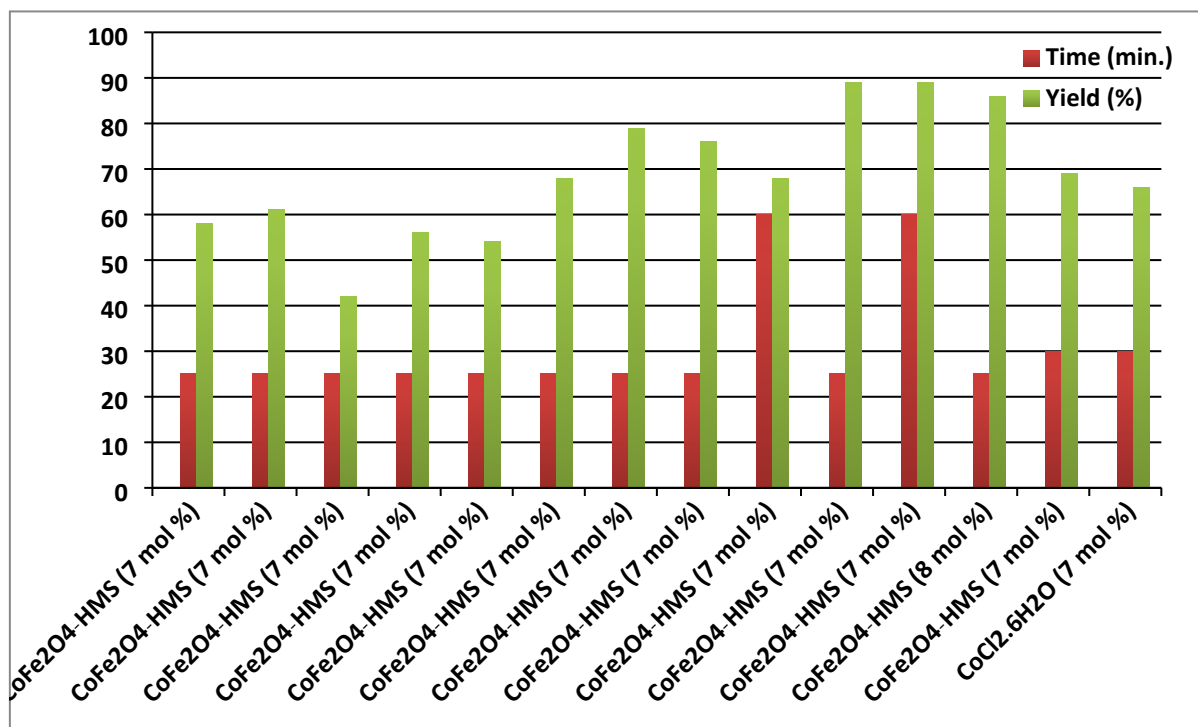

**Figure 1.** Correlation between catalytic activity and reaction efficiency for the synthesis of 3-benzyl-2-phenyl imidazo[1,2-*a*]pyridine (**4a**)

**Table 1.** Comparison of catalytic activity of different catalysts on the model reaction for the synthesis of 3-benzyl-2-phenylimidazo[1,2-*a*]pyridine (**4a**)

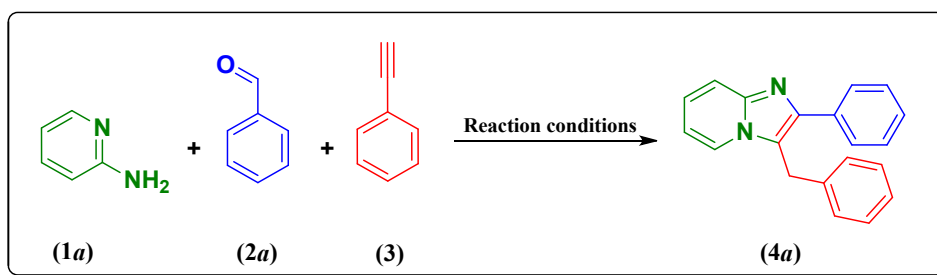

| Entry | Reaction conditions                                                                             | Solvent          | Temperature/<br>Time       | Yield (%) | Recyclability | Ref.     |
|-------|-------------------------------------------------------------------------------------------------|------------------|----------------------------|-----------|---------------|----------|
| 1     | CuSO <sub>4</sub> ·5H <sub>2</sub> O (10 mol %) / Sodium ascorbate (20 mol %) / SDS (10 mol %)  | H <sub>2</sub> O | 50 °C / 6 h                | 88        | No            | [1]      |
| 2     | Fe <sub>3</sub> O <sub>4</sub> @SiO <sub>2</sub> NPs (5 mol %) / K <sub>2</sub> CO <sub>3</sub> | EtOH             | Reflux / 3 h               | 86        | Yes           | [2]      |
| 3     | PW-CIS500 (0.9 mol %)                                                                           | -                | 100 °C / 2.5 h             | 95        | Yes           | [3]      |
| 4     | Cu (1):Mn (0.25) (10 mol %)                                                                     | H <sub>2</sub> O | 100 °C / 4 h               | 85        | Yes           | [4]      |
| 5     | InBr <sub>3</sub> (10 mol %)                                                                    | Dry toluene      | 120 °C / 12 h              | 82        | No            | [5]      |
| 6     | CuCl (5 mol %), Cu(OTf) <sub>2</sub> (5 mol %)                                                  | toluene          | 120 °C / 16 h              | 93        | No            | [6]      |
| 7     | CoFe <sub>2</sub> O <sub>4</sub> -HMS (7 mol %)                                                 | PEG 400          | r.t. / 0.42 h<br>(25 min.) | 89        | Yes           | Our work |

❖ Recycling and reusability of magnetic nanocomposite and solvent

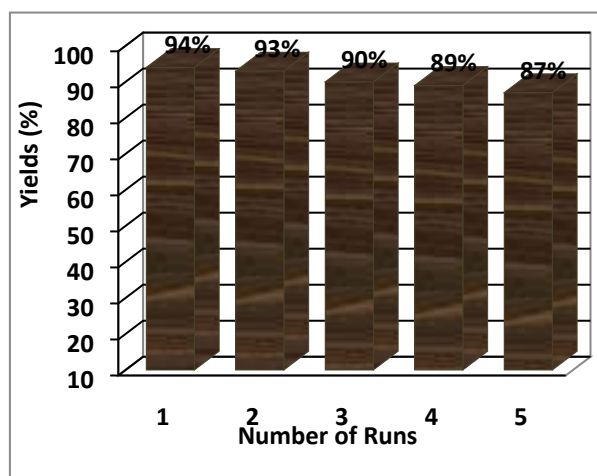

(i).  $\text{CoFe}_2\text{O}_4\text{-HMS}$

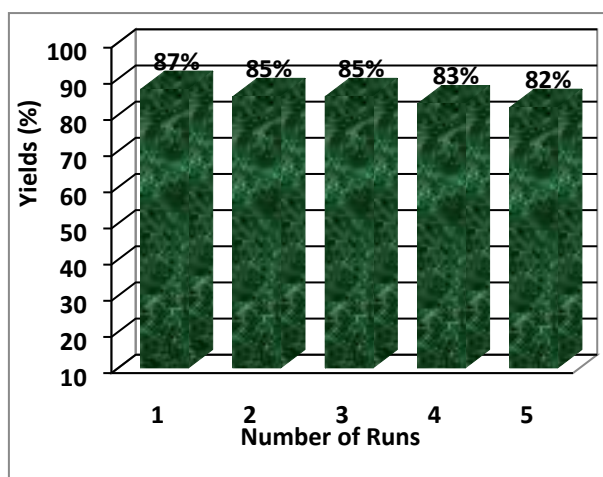

(ii). PEG 400

**Figure 2.** The reusability of  $\text{CoFe}_2\text{O}_4\text{-HMS}$  (i) and PEG 400 (ii) in the synthesis of 3-benzyl-2-(4-chlorophenyl)-7-methylimidazo[1,2-*a*]pyridine (4g)

❖ Characterization of recovered  $\text{CoFe}_2\text{O}_4\text{-HMS}$  magnetic nanocatalyst

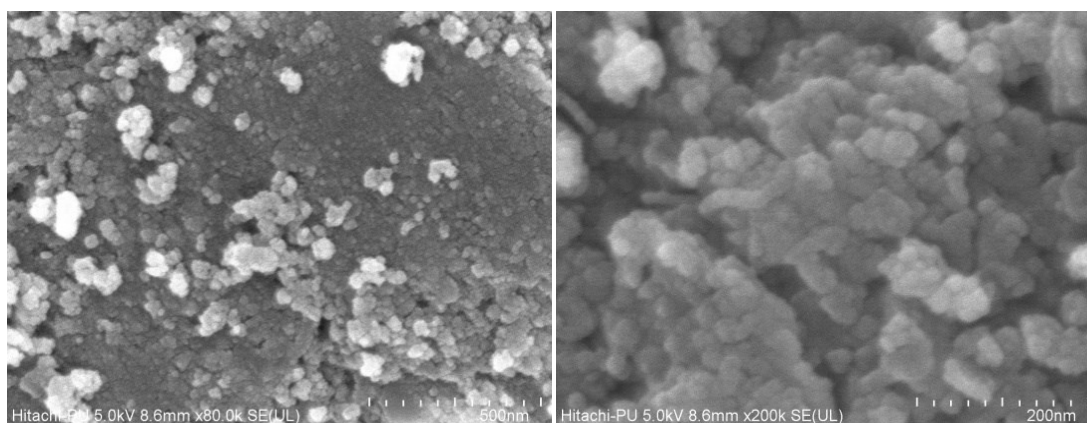

**Figure 3.** The field-emission scanning electron microscopy (FE-SEM) images of recovered  $\text{CoFe}_2\text{O}_4\text{-HMS}$  after fifth cycle

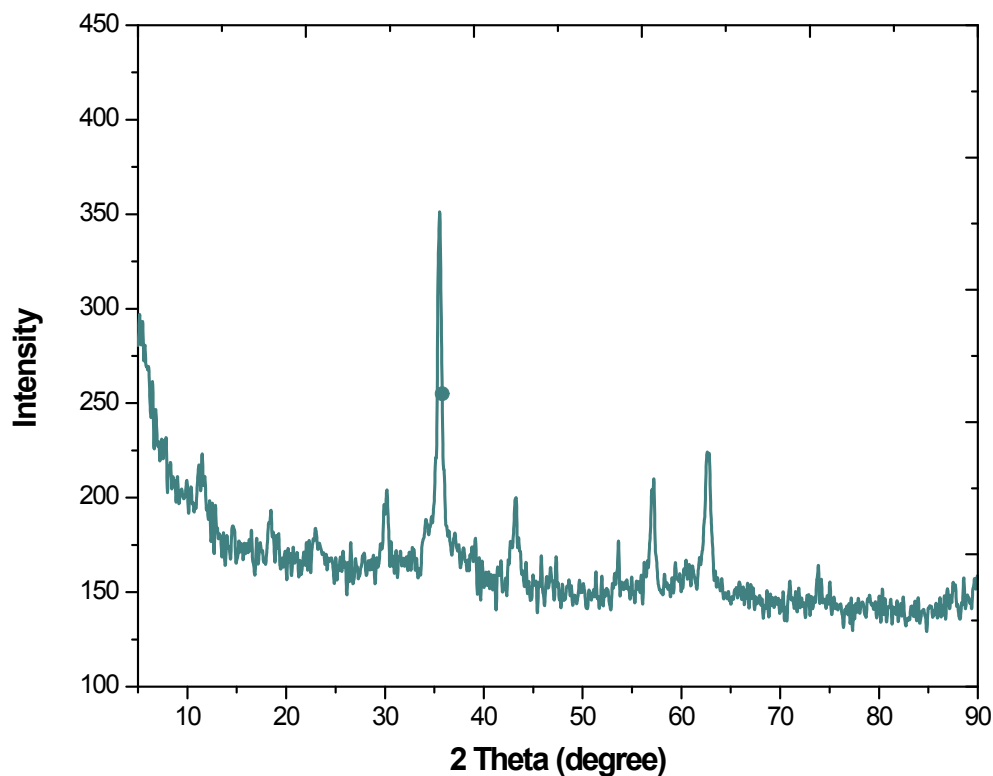

Figure 4. The PXRD diffraction pattern of  $\text{CoFe}_2\text{O}_4\text{-HMS}$  after fifth cycle of recovery of the catalyst

❖ **Heterogeneous nature of  $\text{CoFe}_2\text{O}_4\text{-HMS}$  magnetic nanocatalyst**

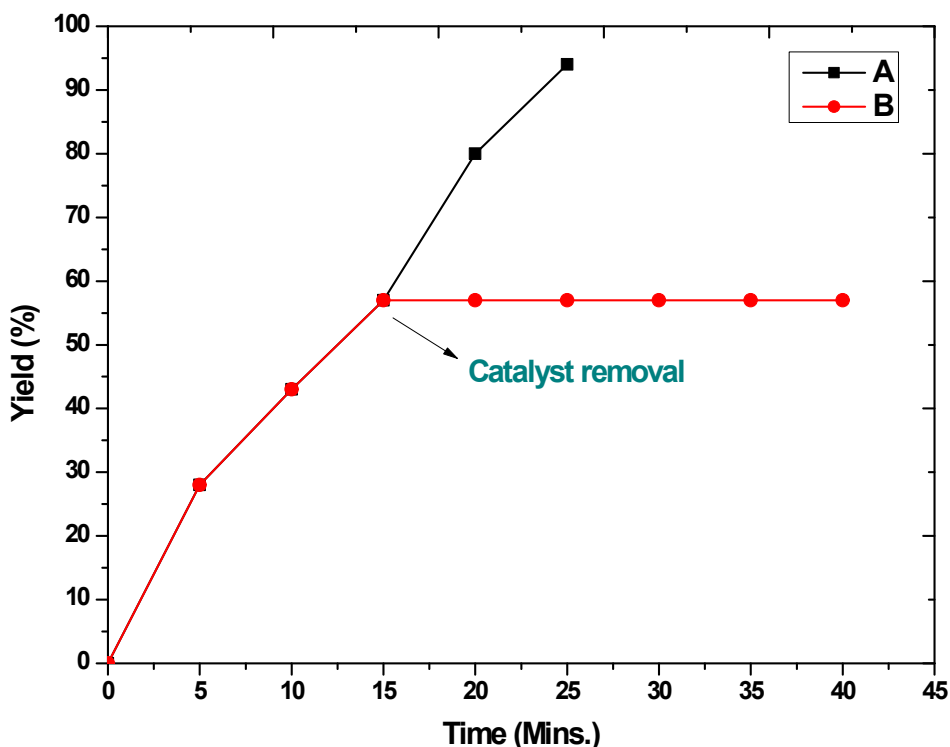

Figure 5. Hot filtration test and leaching effect of  $\text{CoFe}_2\text{O}_4\text{-HMS}$  for the ultrasonic-assisted synthesis of 2-benzyl-3-(4-chlorophenyl)-7-methylimidazo[1,2-*a*]pyridine (4g).

**Reaction conditions:** 2-amino-4methyl pyridine (1 mmol), 4-chlorobenzaldehyde (1 mmol), phenyl acetylene (1 mmol) in the presence of PEG 400 with catalyst (A) and catalyst removal (B) after 15 minutes.

❖ **FTIR Analyses**

**Table 2.** Functional groups with their wave number values

| S.No. | Wave numbers (cm <sup>-1</sup> )            | Functional groups                    |
|-------|---------------------------------------------|--------------------------------------|
| 1.    | 3649, 3648, 3386, 3235                      | Stretching vibration of O-H group    |
| 2.    | 2981, 2891                                  | Stretching vibration of C-H group    |
| 3.    | 1644, 1634                                  | Stretching vibration of C=O group    |
| 4.    | 1353, 1251                                  | Bending vibration of –CH group       |
| 5.    | 1476, 1470, 1462, 1417, 1381, 955, 954, 880 | Bending vibration of O-H group       |
| 6.    | 1155, 1116, 1095, 1070                      | Stretching vibration of C-O group    |
| 7.    | 723, 717, 588, 538, 534                     | Deformation vibration of Fe-OH group |
| 8.    | 493                                         | Deformation vibration of Co-O group  |

❖ **Raman Analyses**

**Table 3.** Measured Raman shift, Peak position, and vibrational modes of the samples

| S.No. | Peak Position (cm <sup>-1</sup> )     | Raman Shift | Peak Position (cm <sup>-1</sup> )     | Raman Shift | Peak Position (cm <sup>-1</sup> ) | Raman Shift | Vibrational Mode    | Assignment                                  |
|-------|---------------------------------------|-------------|---------------------------------------|-------------|-----------------------------------|-------------|---------------------|---------------------------------------------|
|       | CoFe <sub>2</sub> O <sub>4</sub> -HMS |             | CoFe <sub>2</sub> O <sub>4</sub> MNPs |             | HMS                               |             |                     |                                             |
| 1.    | 213.238                               | 165         | 200.995                               | 147         | -                                 | -           | A <sub>1g</sub> (1) | Symmetric stretching Fe-O                   |
| 2.    | 243.767                               | 210         | 243.767                               | 210         | -                                 | -           | A <sub>1g</sub> (2) | Symmetric stretching Fe(Co)-O               |
| 3.    | 472.060                               | 552         | 477.323                               | 560         | -                                 | -           | T <sub>2g</sub> (2) | Asymmetric stretching Fe-O                  |
| 4.    | 564.942                               | 693         | 571.442                               | 705         | -                                 | -           | T <sub>2g</sub> (3) | Asymmetric bending Fe(Co)-O                 |
| 5.    | 613.556                               | 769         | 618.078                               | 776         | -                                 | -           | E <sub>g</sub>      | Symmetric bending Fe(Co)-O                  |
| 6.    | 686.863                               | 883         | 702.847                               | 908         | -                                 | -           | T <sub>2g</sub> (1) | Translation motion of the whole tetrahedron |
| 7.    | 1125.05                               | 1583        | -                                     | -           | 1125.05                           | 1583        | ν <sub>1</sub>      | Hydromagnesite band                         |

❖ **Surface Basic Property (Temperature Programmed Desorption of CO<sub>2</sub> (CO<sub>2</sub>-TPD))**

**Table 4.** The numbers of the weak and medium basic sites on the surface of HMS and CoFe<sub>2</sub>O<sub>4</sub>-HMS

| Sample                                | Weak Basic sites (a.u./m <sup>2</sup> ) | Medium Basic sites (a.u./m <sup>2</sup> ) | Weak Basic sites/Medium Basic sites | Weak Basic sites/(Weak + Medium) Basic sites |
|---------------------------------------|-----------------------------------------|-------------------------------------------|-------------------------------------|----------------------------------------------|
| HMS                                   | 4.8                                     | 22.5                                      | 0.21                                | 0.18                                         |
| CoFe <sub>2</sub> O <sub>4</sub> -HMS | 5.5                                     | 12.9                                      | 0.43                                | 0.30                                         |

Figure S1. The  $^1\text{H}$  NMR Spectrum of 3-benzyl-2-phenylimidazo[1,2-a]pyridine (**4a**):

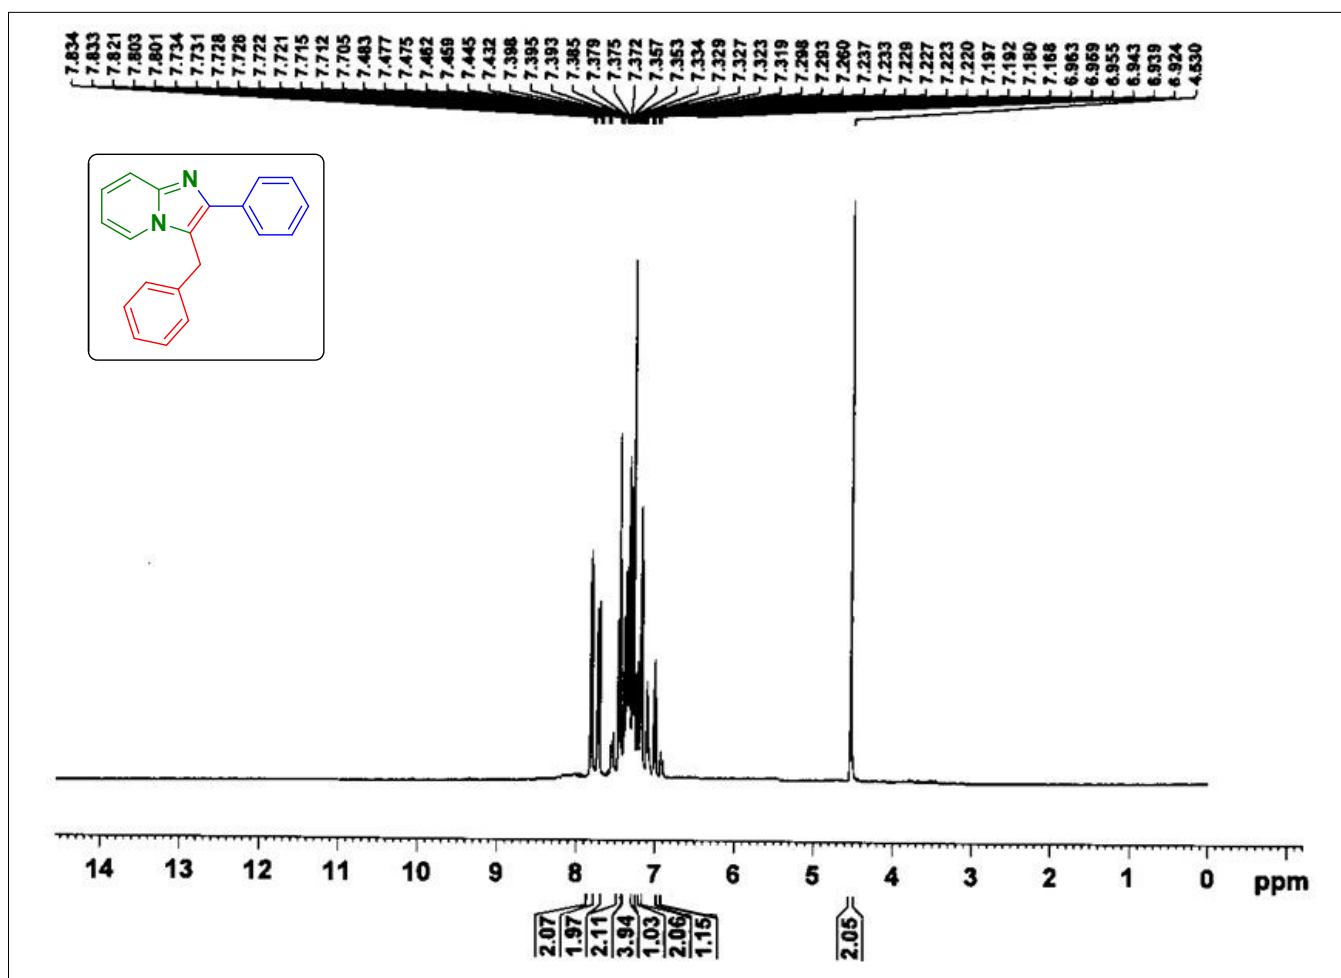

Figure S2. The  $^{13}\text{C}$  NMR Spectrum of 3-benzyl-2-phenylimidazo[1,2-a]pyridine (**4a**):

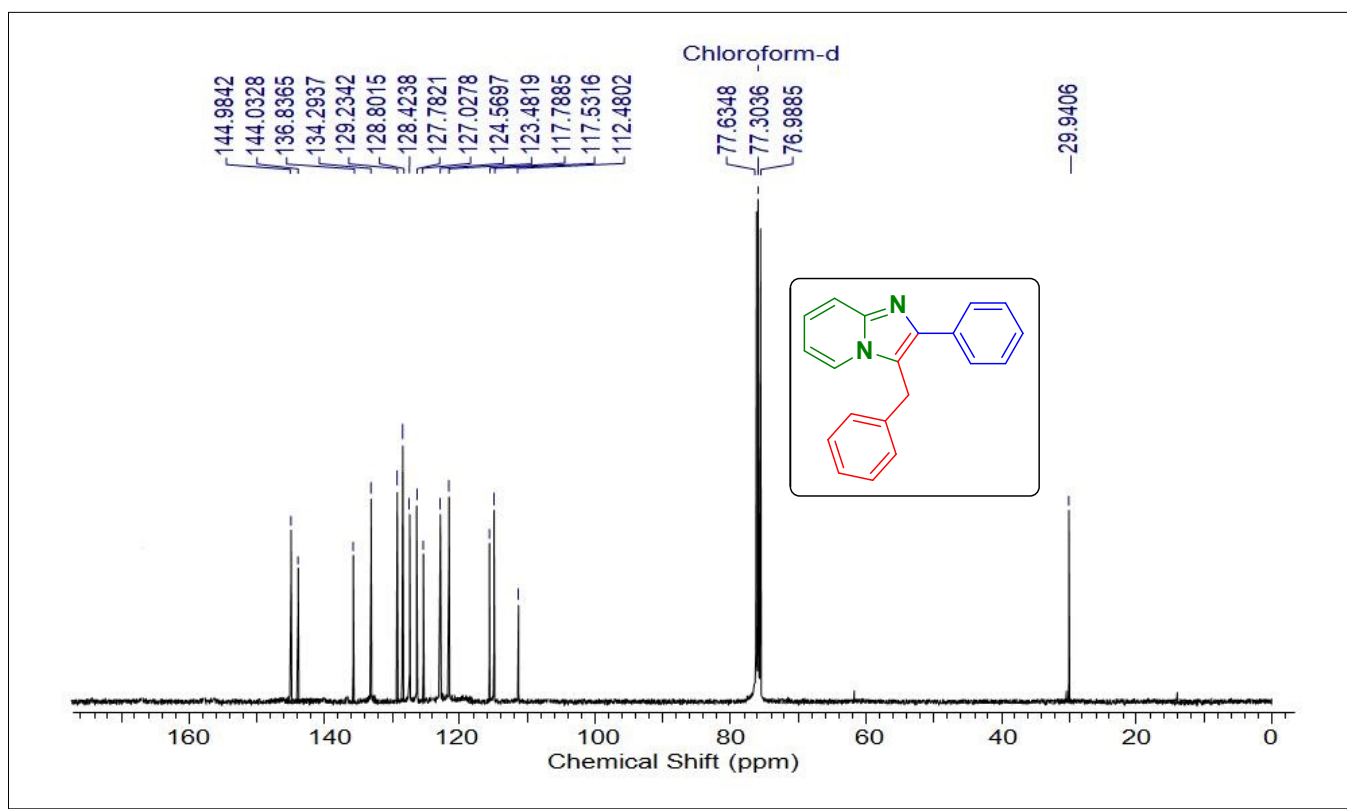



Figure S3. The  $^1\text{H}$  NMR Spectrum of 3-benzyl-2-(4-chlorophenyl)imidazo[1,2-a]pyridine (**4b**):

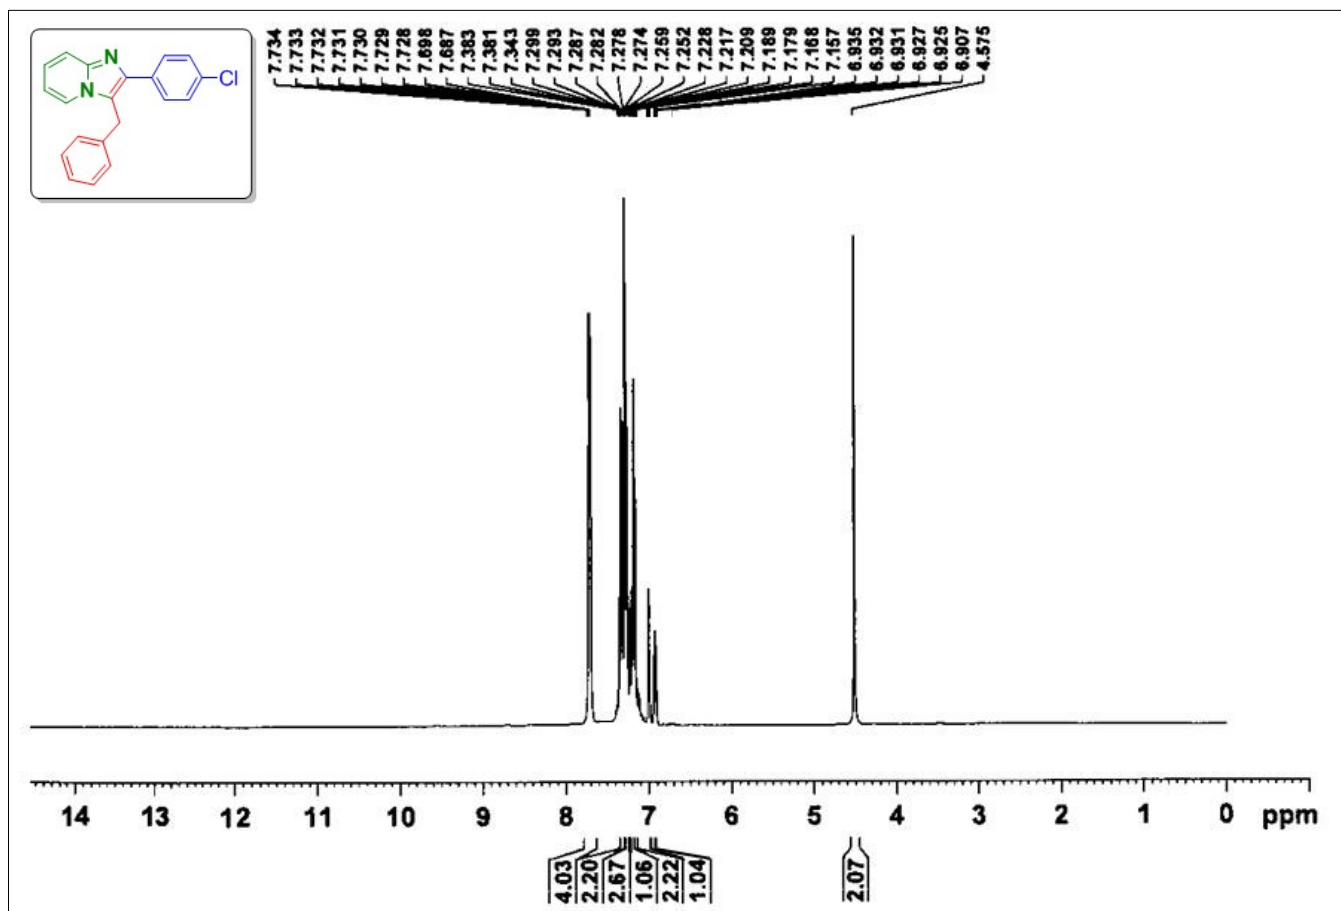

**Figure S4.** The  $^{13}\text{C}$  NMR Spectrum of 3-benzyl-2-(4-chlorophenyl)imidazo[1,2-a]pyridine (**4b**):

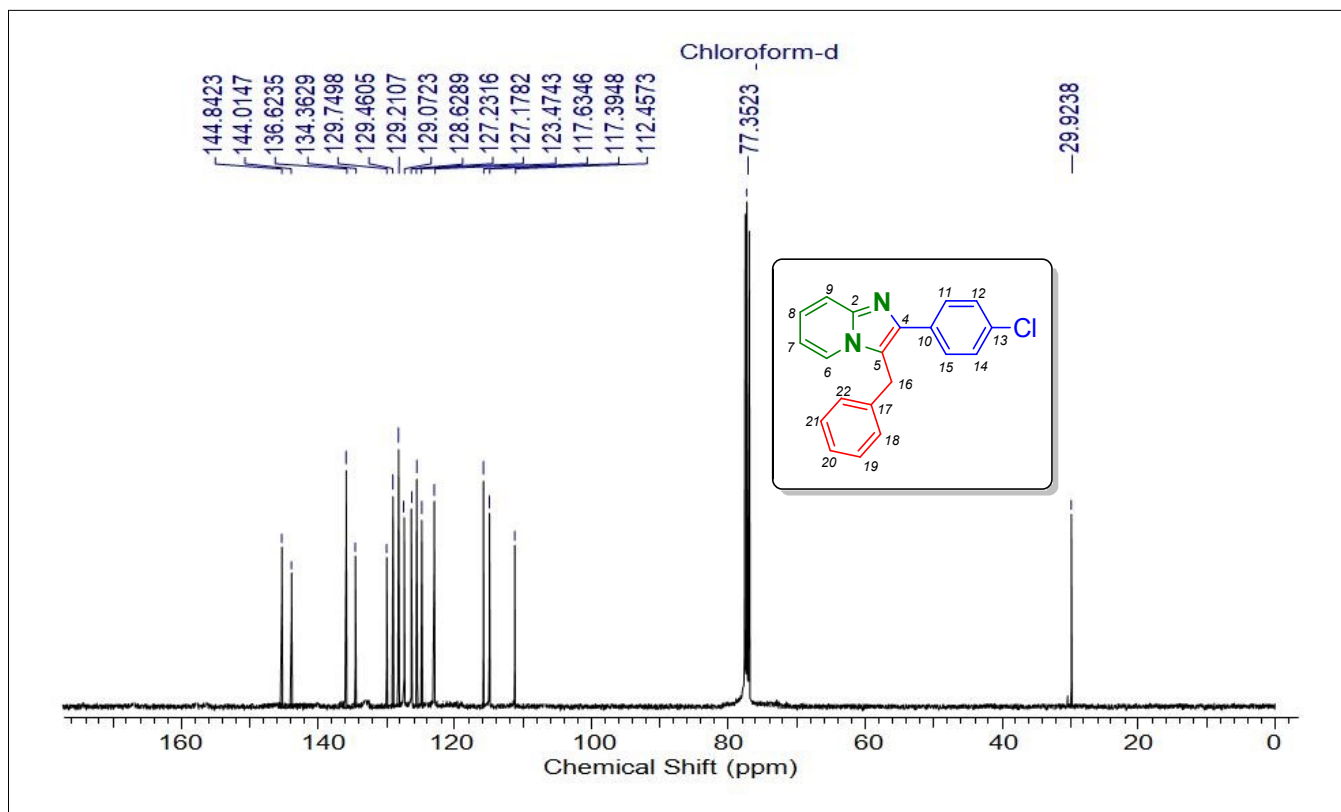

Figure S5. The IR Spectrum of 4-(3-benzylimidazo[1,2-a]pyridin-2-yl)phenol (4c):

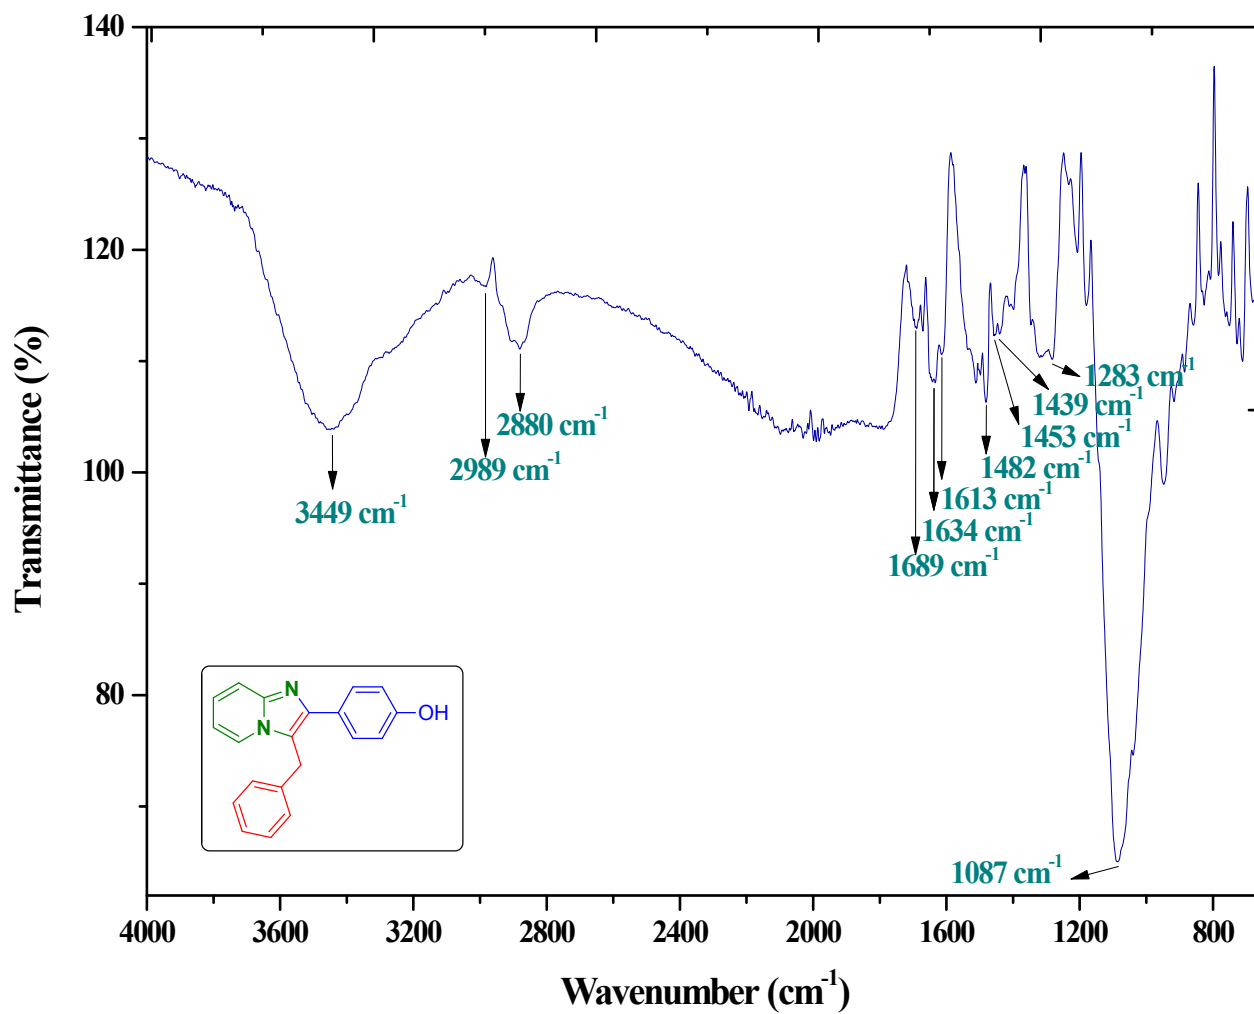

Figure S6. The  $^1\text{H}$  NMR Spectrum of 4-(3-benzylimidazo[1,2-a]pyridin-2-yl)phenol (**4c**):

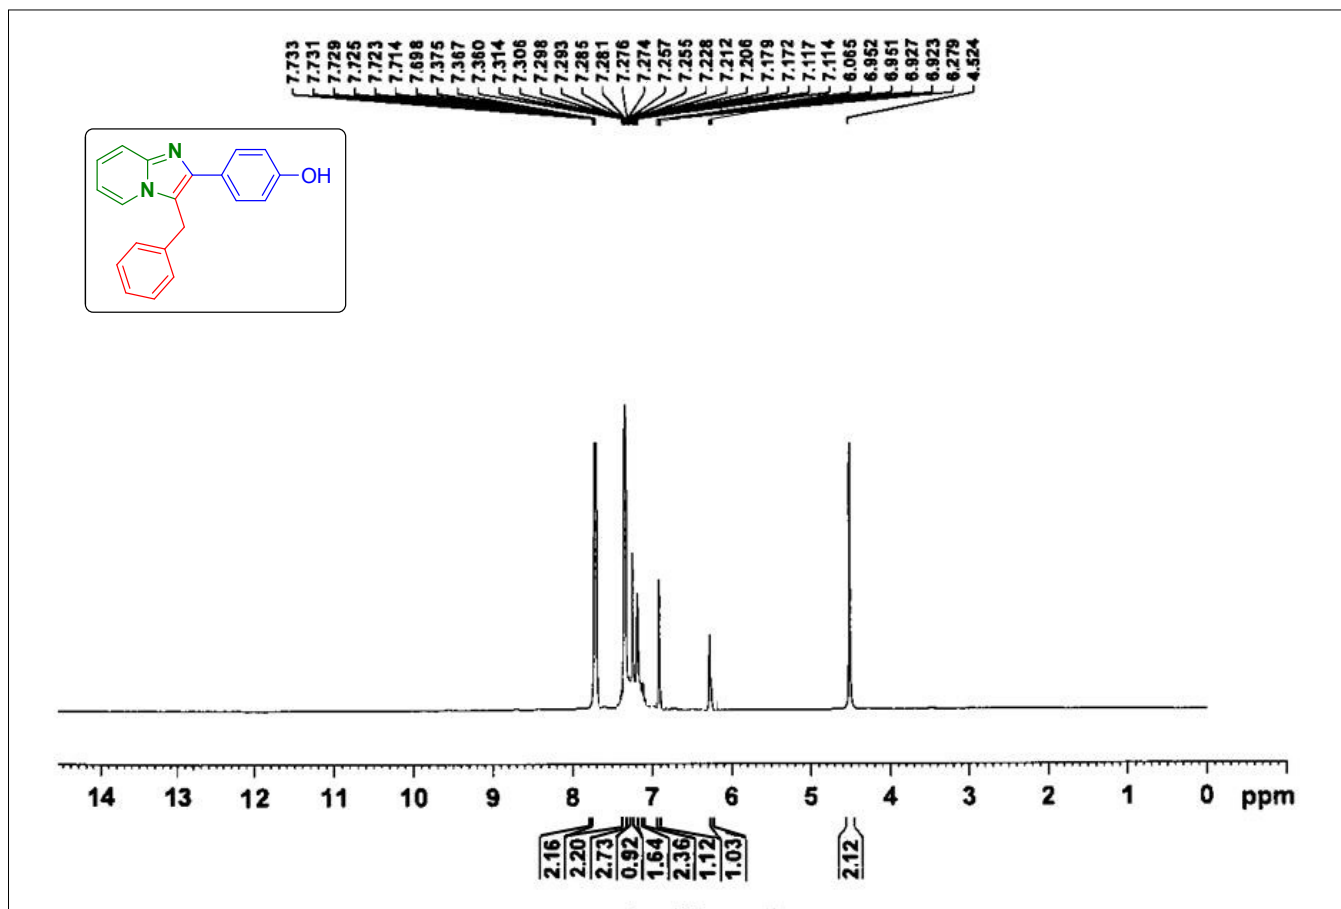

**Figure S7.** The  $^{13}\text{C}$  NMR Spectrum of 4-(3-benzylimidazo[1,2-a]pyridin-2-yl)phenol (**4c**):

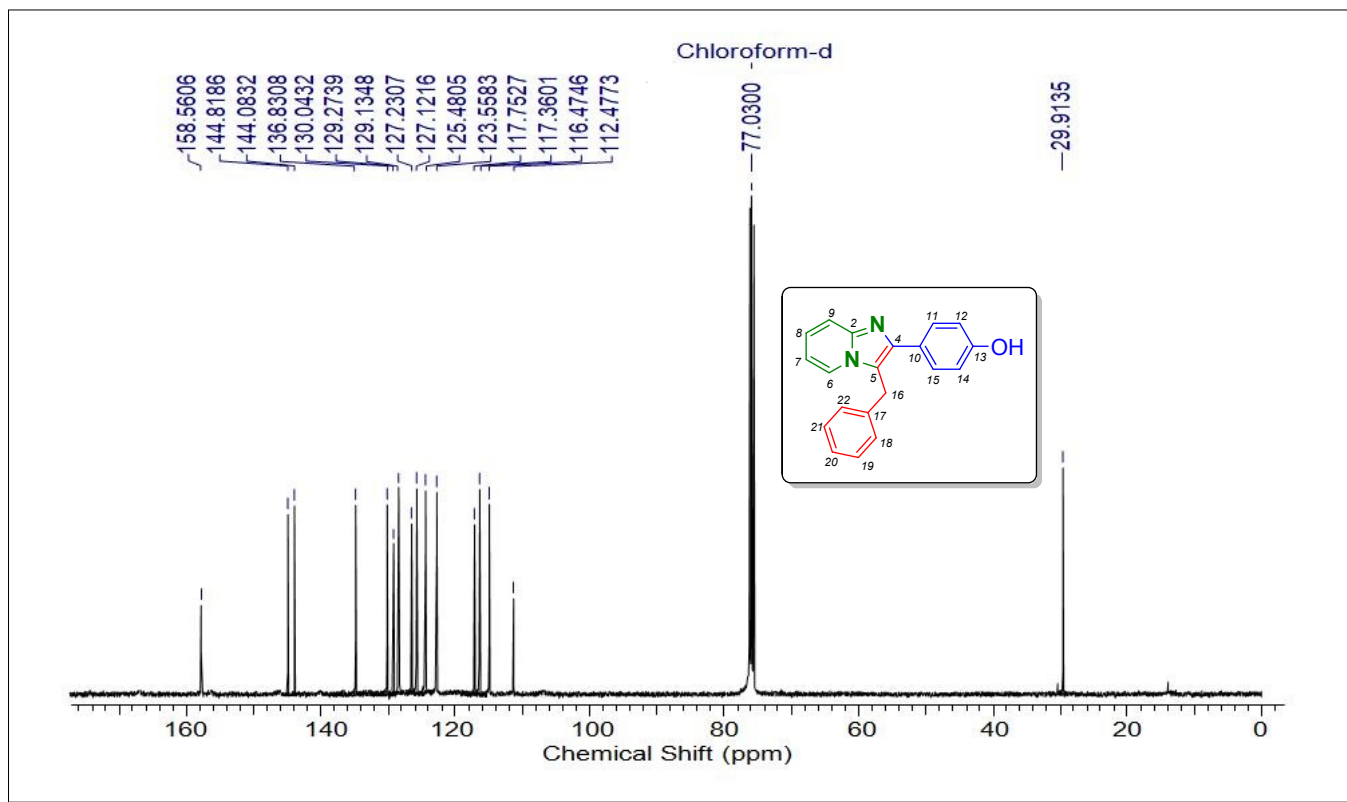

Figure S8. The  $^1\text{H}$  NMR Spectrum of 3-benzyl-2-(2-nitrophenyl)imidazo[1,2-a]pyridine (**4d**):

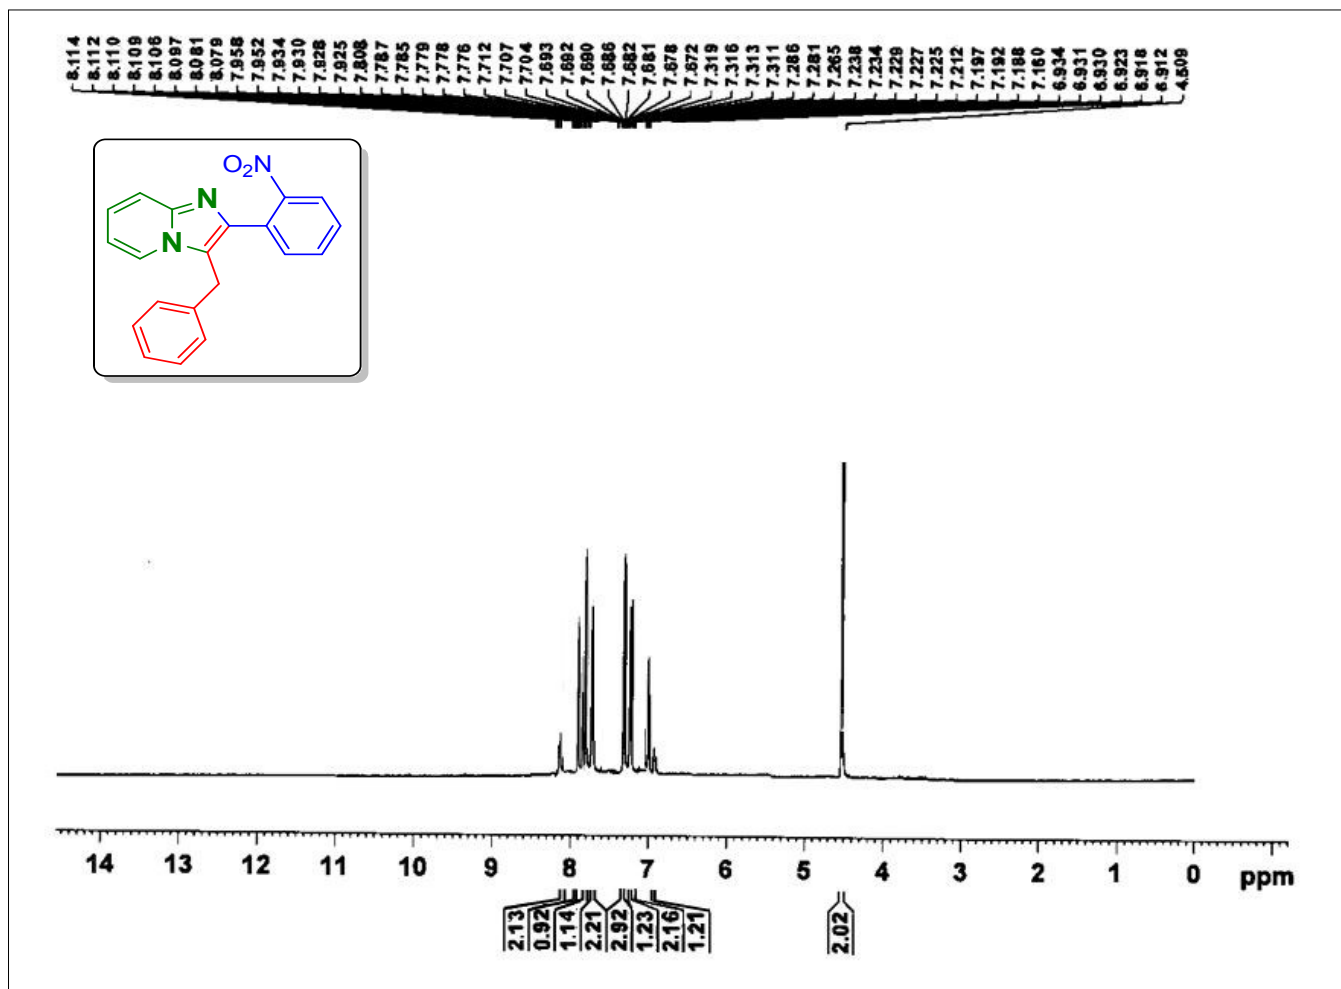

**Figure S9.** The  $^{13}\text{C}$  NMR Spectrum of 3-benzyl-2-(2-nitrophenyl)imidazo[1,2-a]pyridine (**4d**):

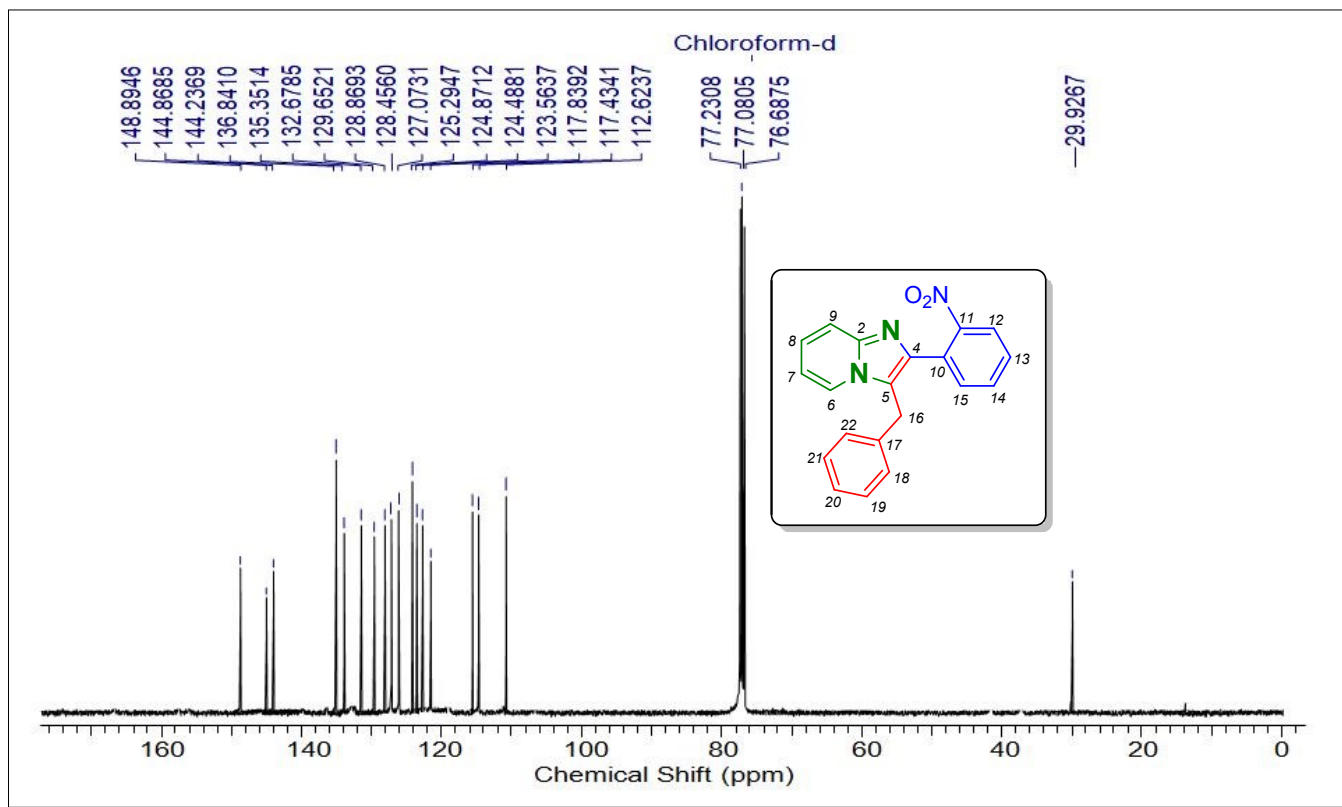

Figure S10. The IR Spectrum of 4-(3-benzylimidazo[1,2-a]pyridin-2-yl)-3-methoxyphenol (4e):

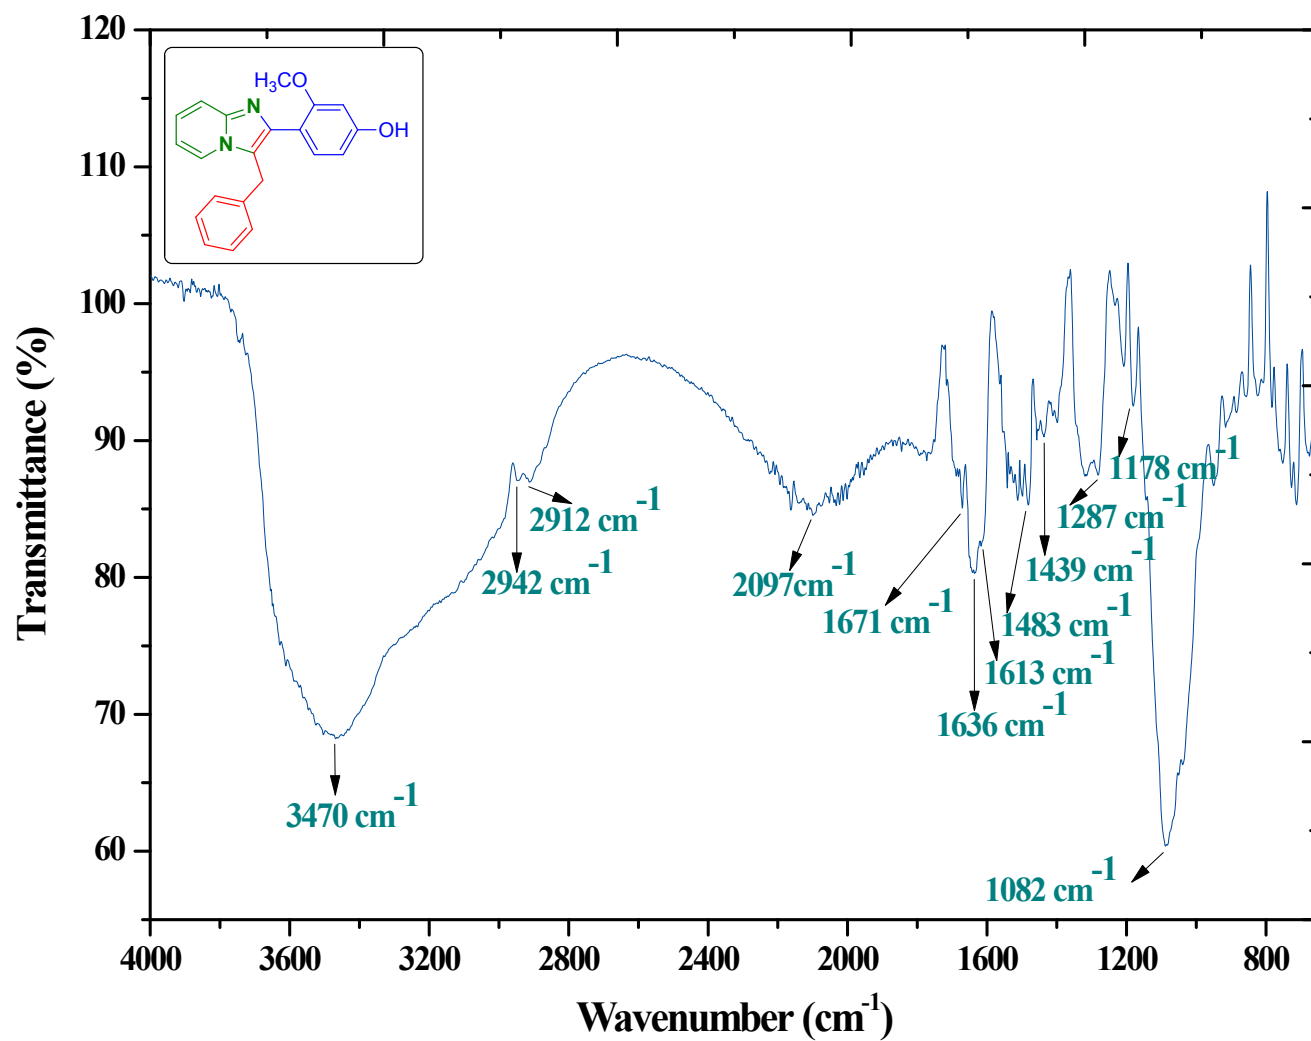



**Figure S11.** The  $^1\text{H}$  NMR Spectrum of 4-(3-benzylimidazo[1,2-a]pyridin-2-yl)-3-methoxyphenol (4e):

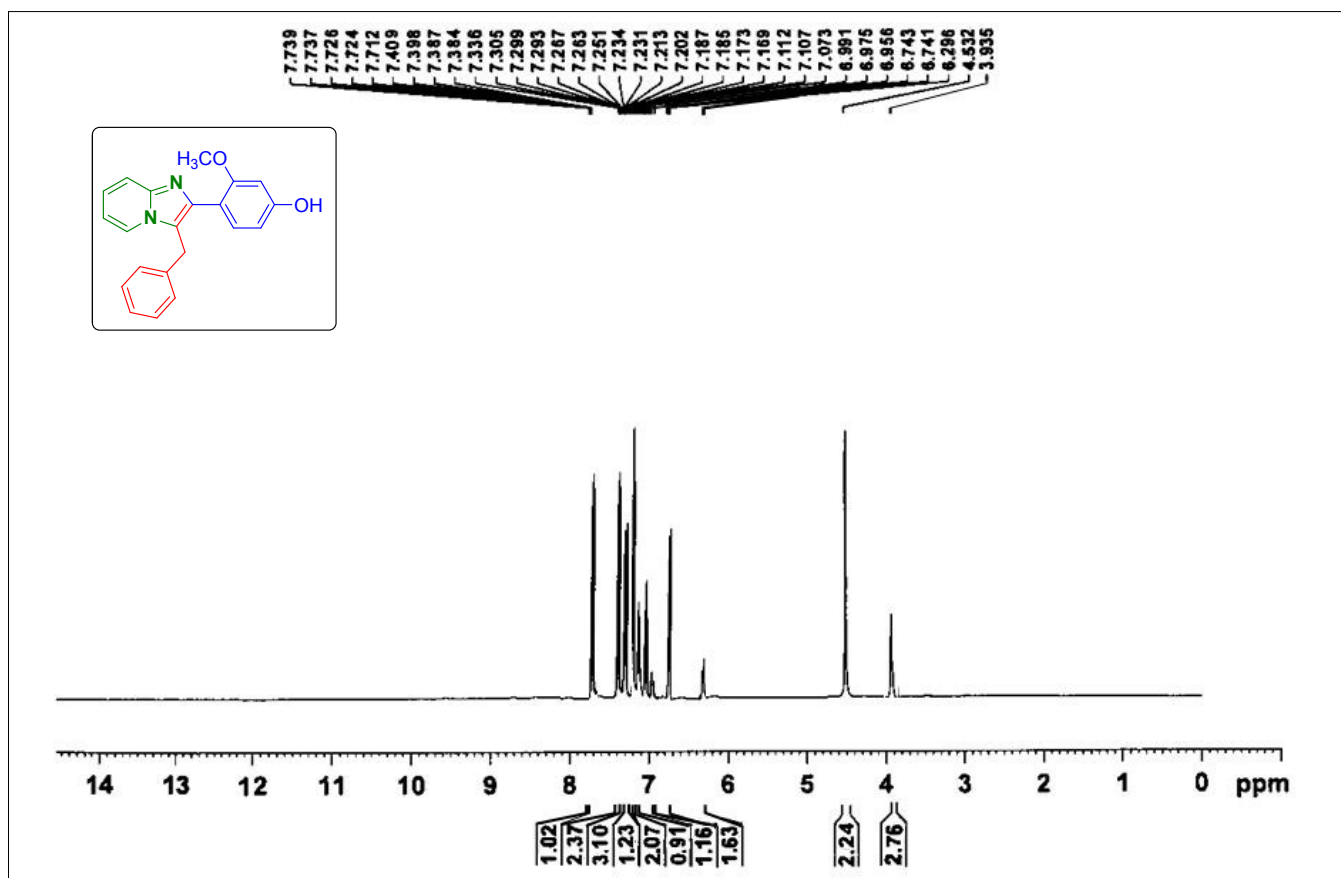

**Figure S12.** The  $^{13}\text{C}$  NMR Spectrum of 4-(3-benzylimidazo[1,2-a]pyridin-2-yl)-3-methoxyphenol (4e):

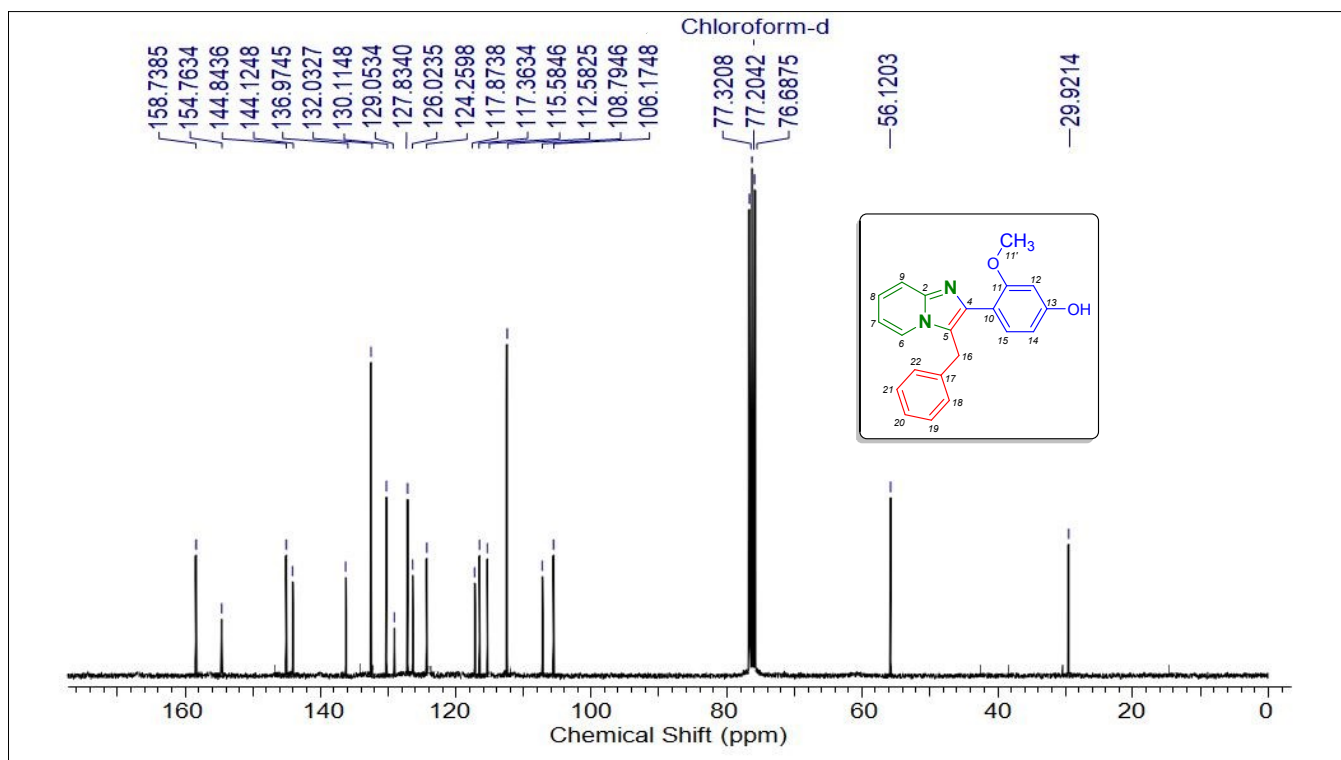

Figure S13. The  $^1\text{H}$  NMR Spectrum of 3-benzyl-7-methyl-2-phenylimidazo[1,2-a]pyridine (4f):

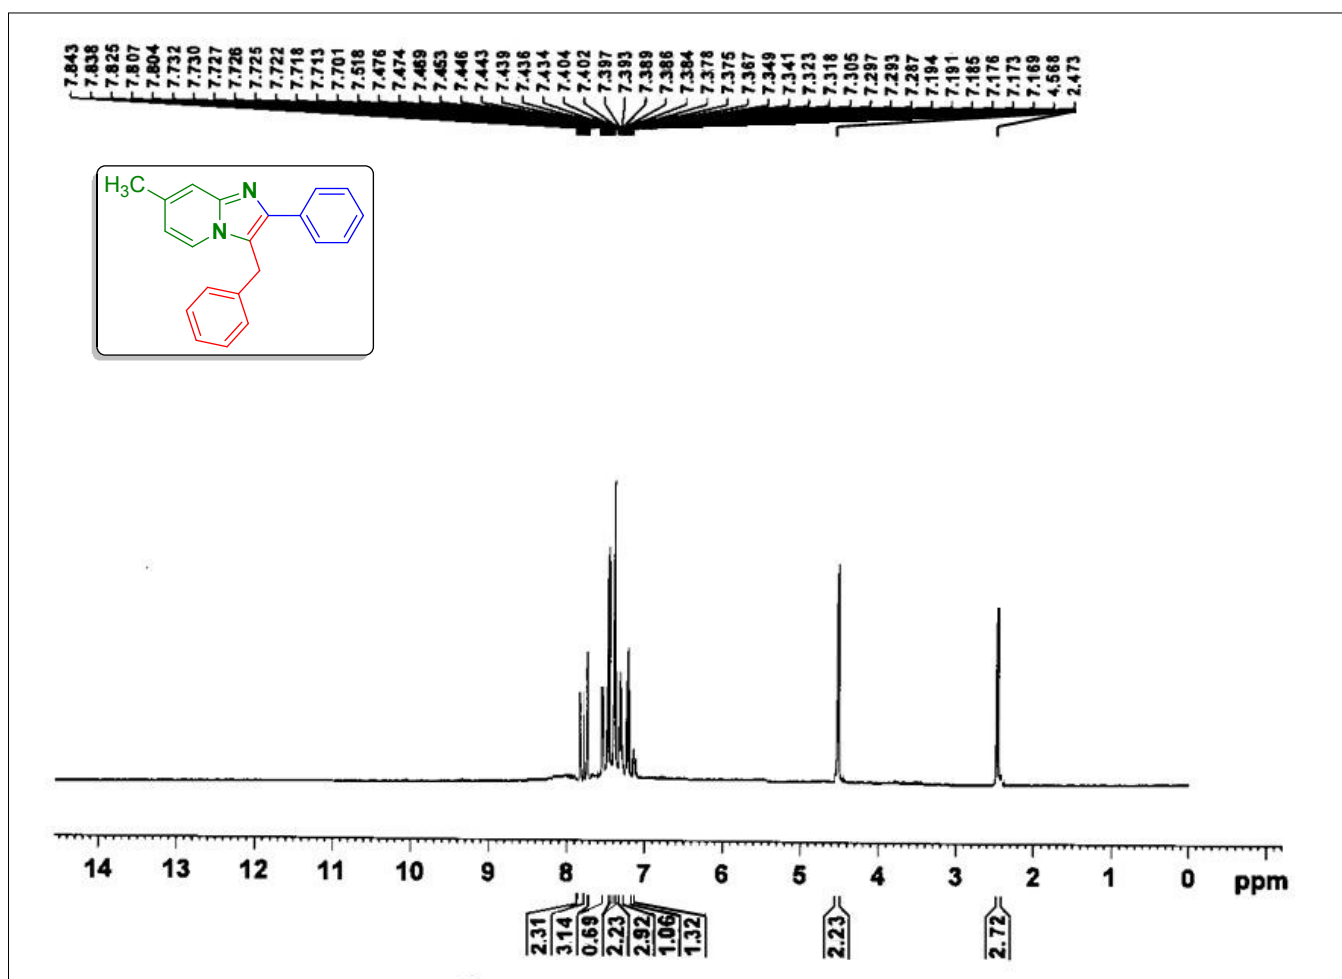

**Figure S14.** The  $^{13}\text{C}$  NMR Spectrum of 3-benzyl-7-methyl-2-phenylimidazo[1,2-a]pyridine (**4f**):

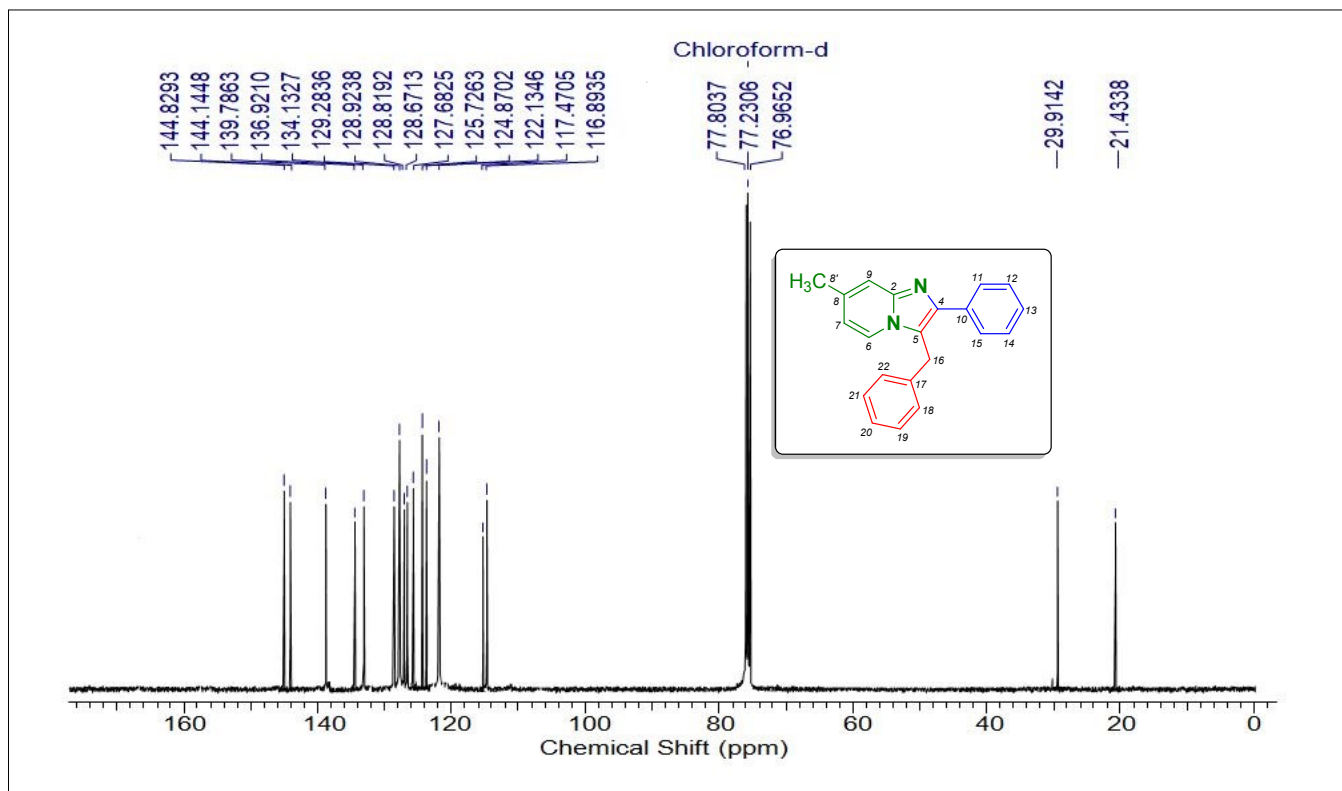

**Figure S15.** The  $^{13}\text{C}$  NMR Spectrum of 3-benzyl-2-(4-chlorophenyl)-7-methylimidazo[1,2-a]pyridine (**4g**):

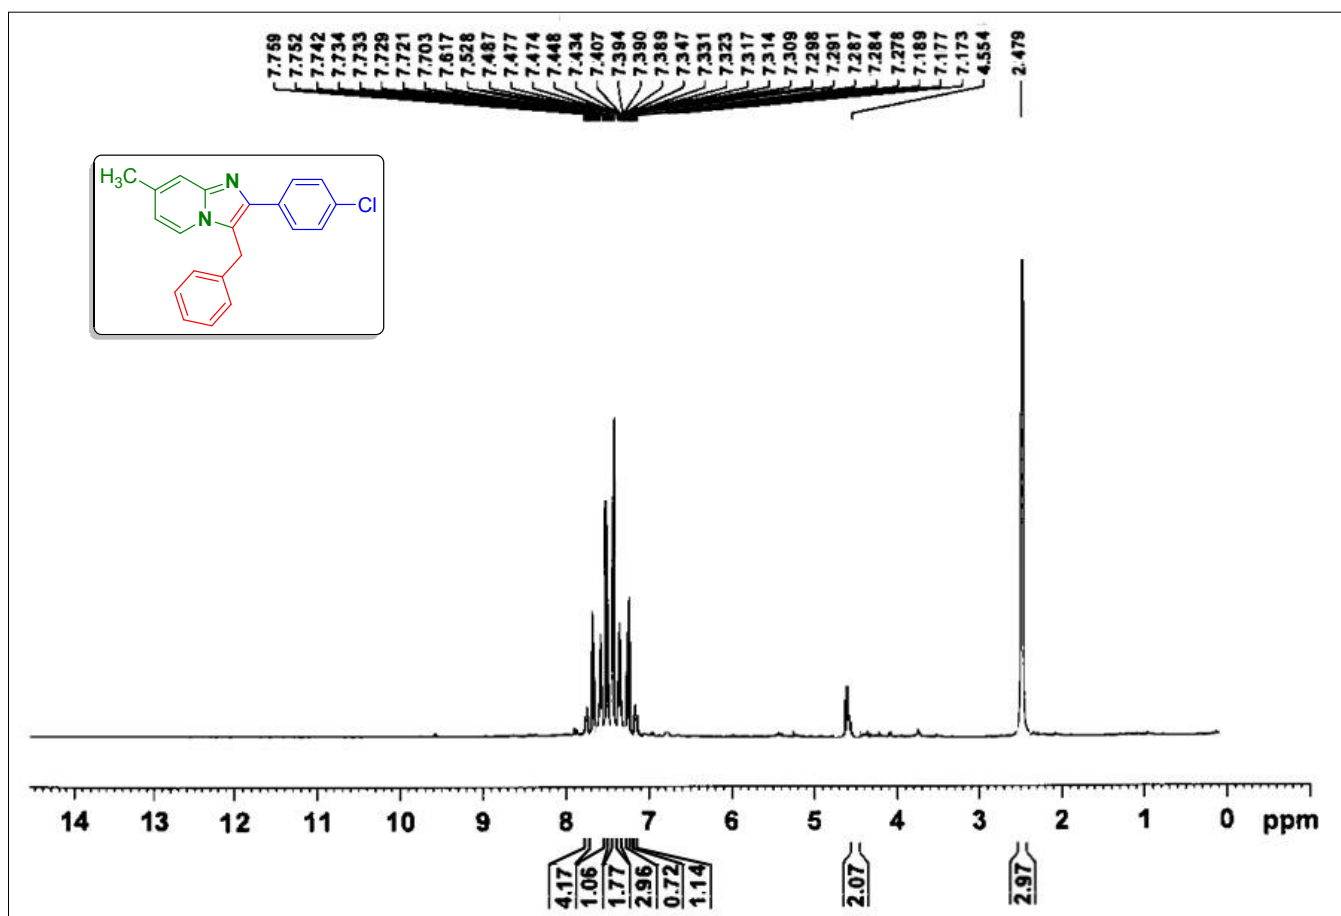

**Figure S16.** The  $^{13}\text{C}$  NMR Spectrum of 3-benzyl-2-(4-chlorophenyl)-7-methylimidazo[1,2-*a*]pyridine (**4g**):

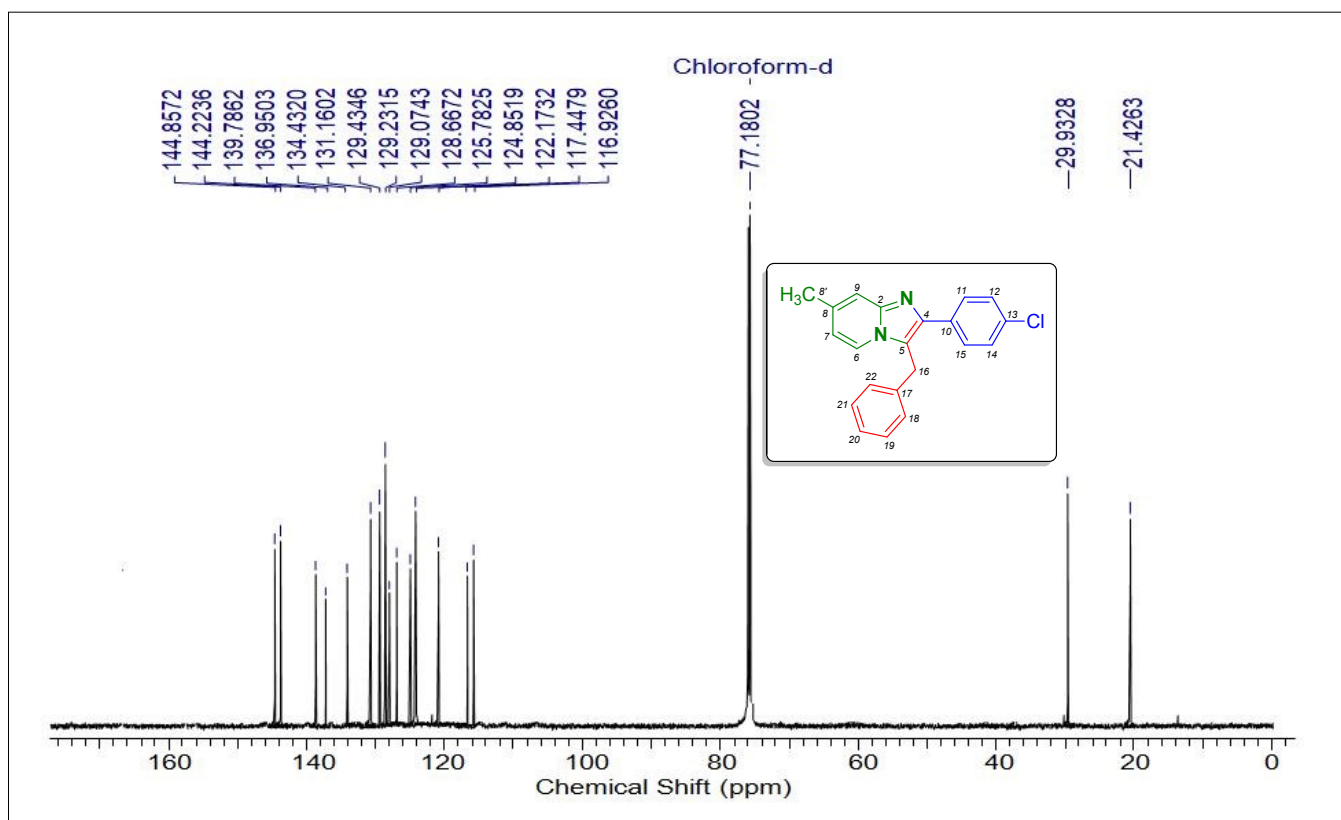

**Figure S17.** The  $^1\text{H}$  NMR Spectrum of 4-(3-benzyl-7-methylimidazo[1,2-a]pyridin-2-yl)phenol (4h):

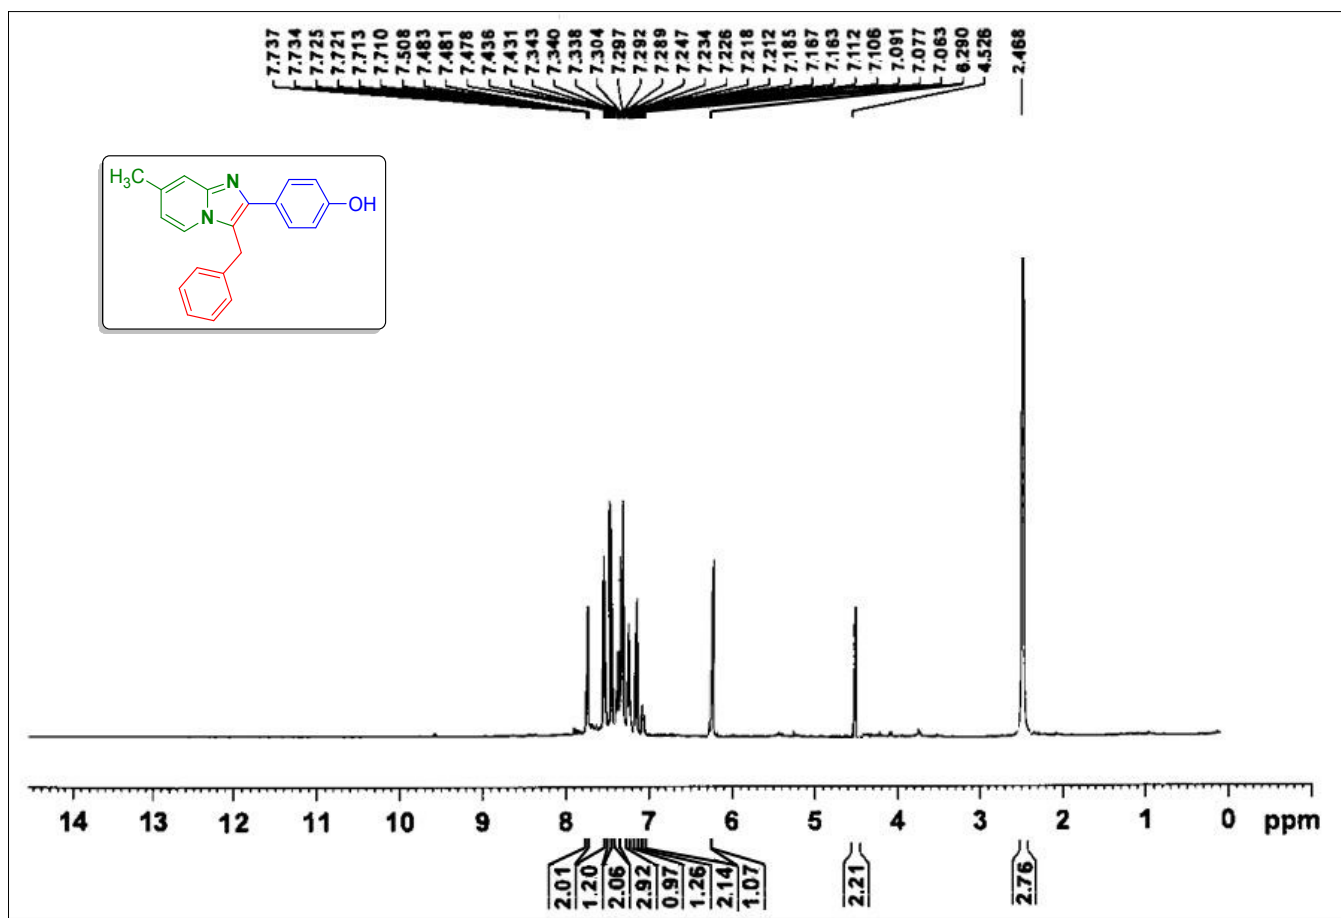

**Figure S18.** The  $^{13}\text{C}$  NMR Spectrum of 4-(3-benzyl-7-methylimidazo[1,2-a]pyridin-2-yl)phenol (4h):

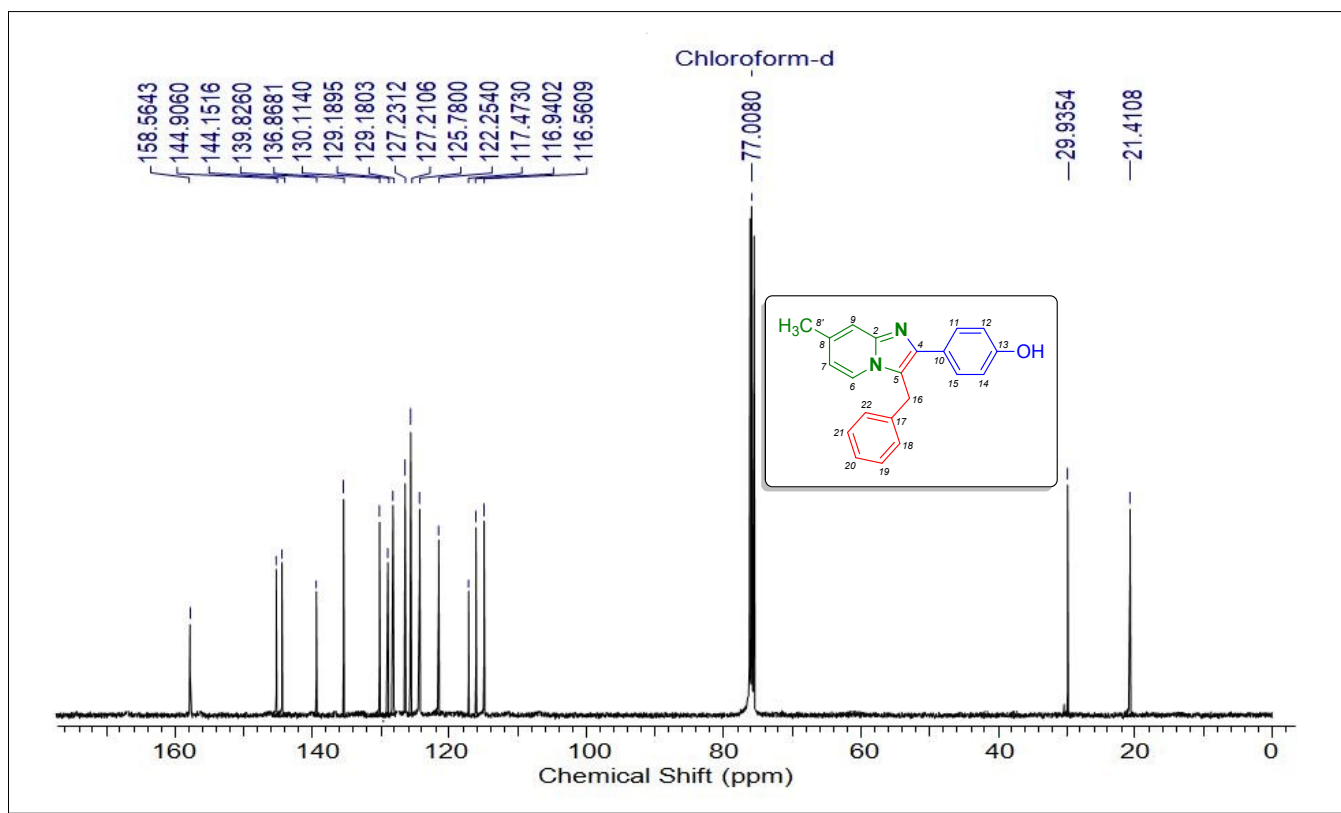



**Figure S19.** The  $^1\text{H}$  NMR Spectrum of 3-benzyl-7-methyl-2-(2-nitrophenyl)imidazo[1,2-a]pyridine (4i):

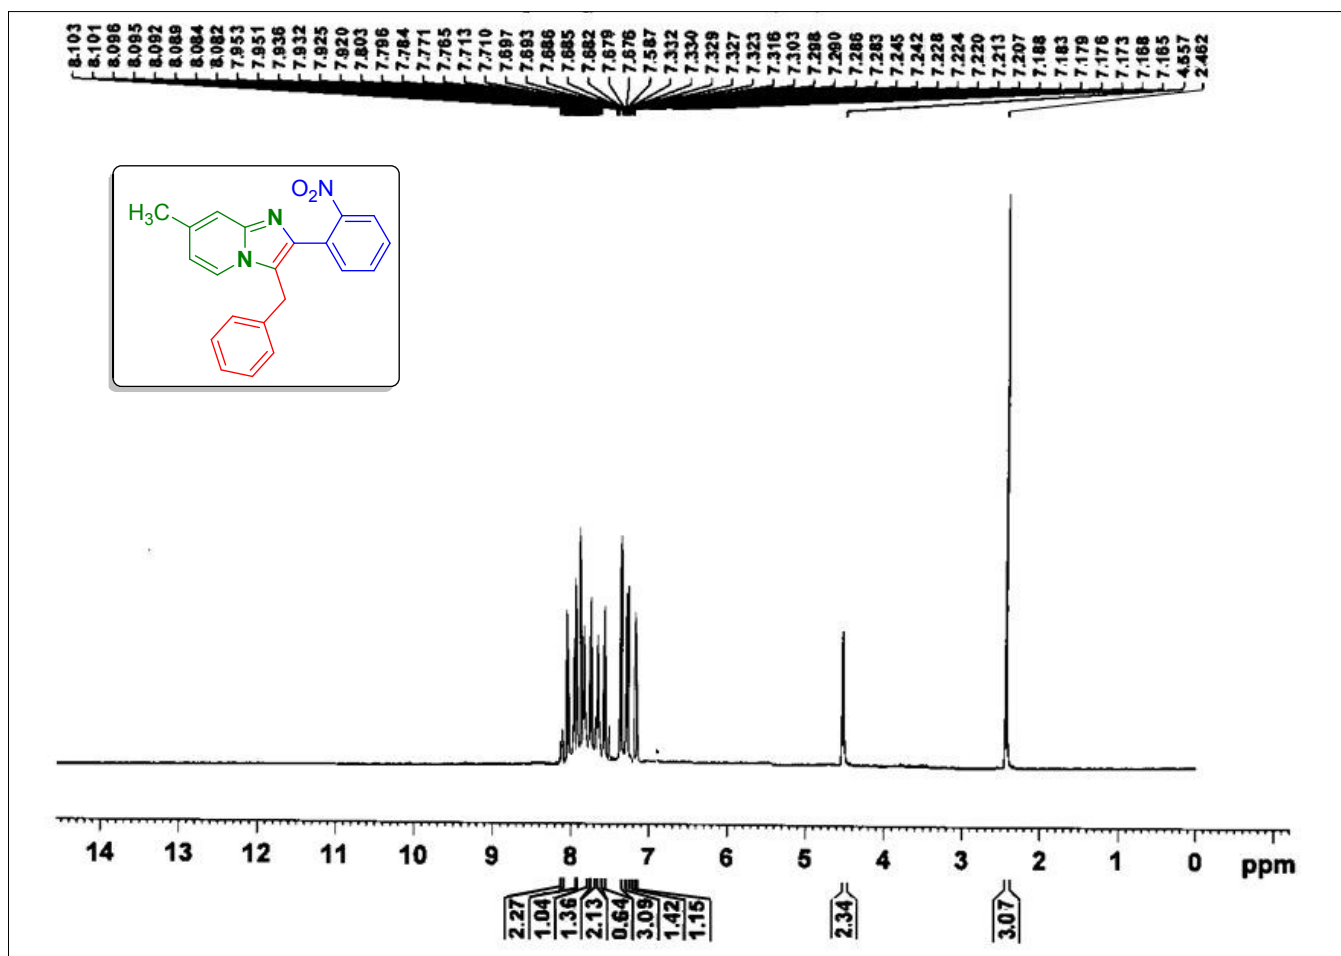

**Figure S20.** The  $^{13}\text{C}$  NMR Spectrum of 3-benzyl-7-methyl-2-(2-nitrophenyl)imidazo[1,2-a]pyridine (4i):

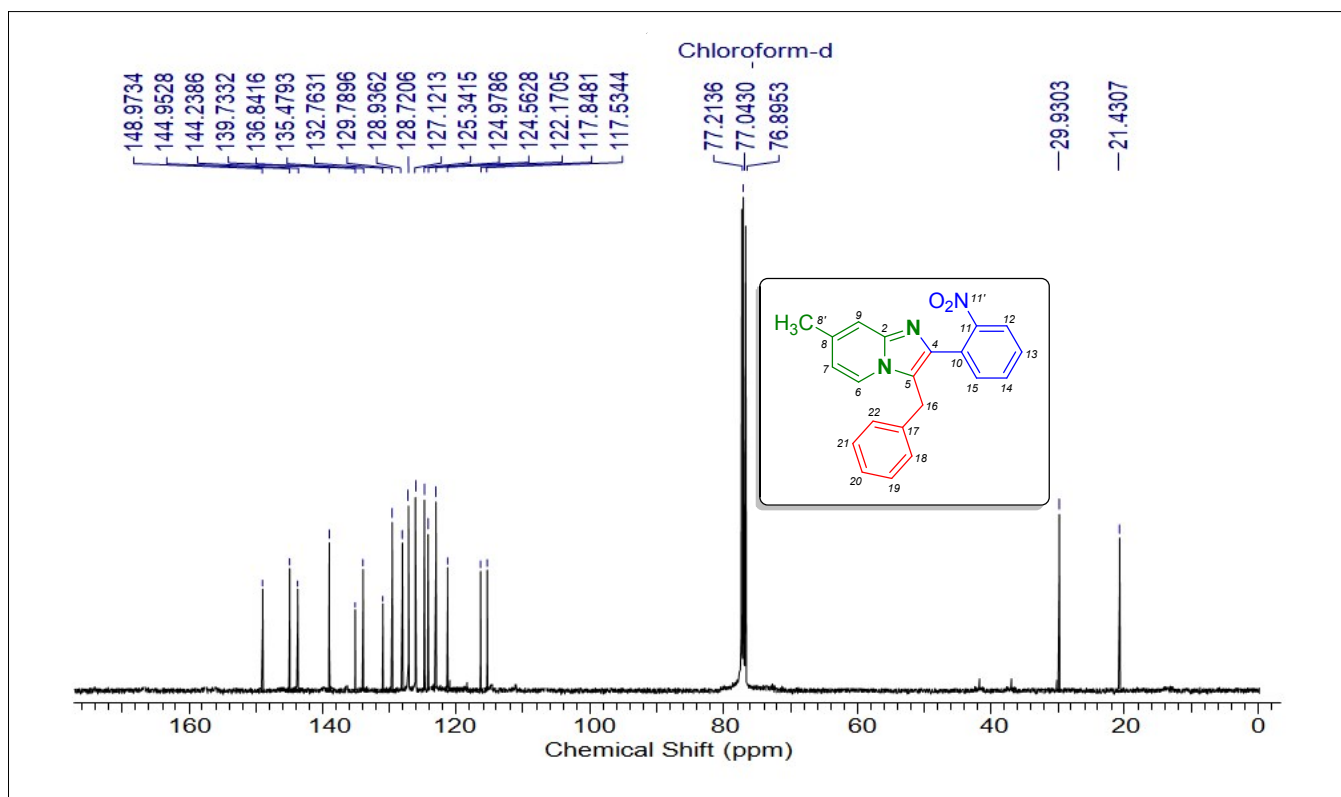

**Figure S21.** The  $^1\text{H}$  NMR Spectrum of 4-(3-benzyl-7-methylimidazo[1,2-a]pyridin-2-yl)-3-methoxyphenol (**4j**):

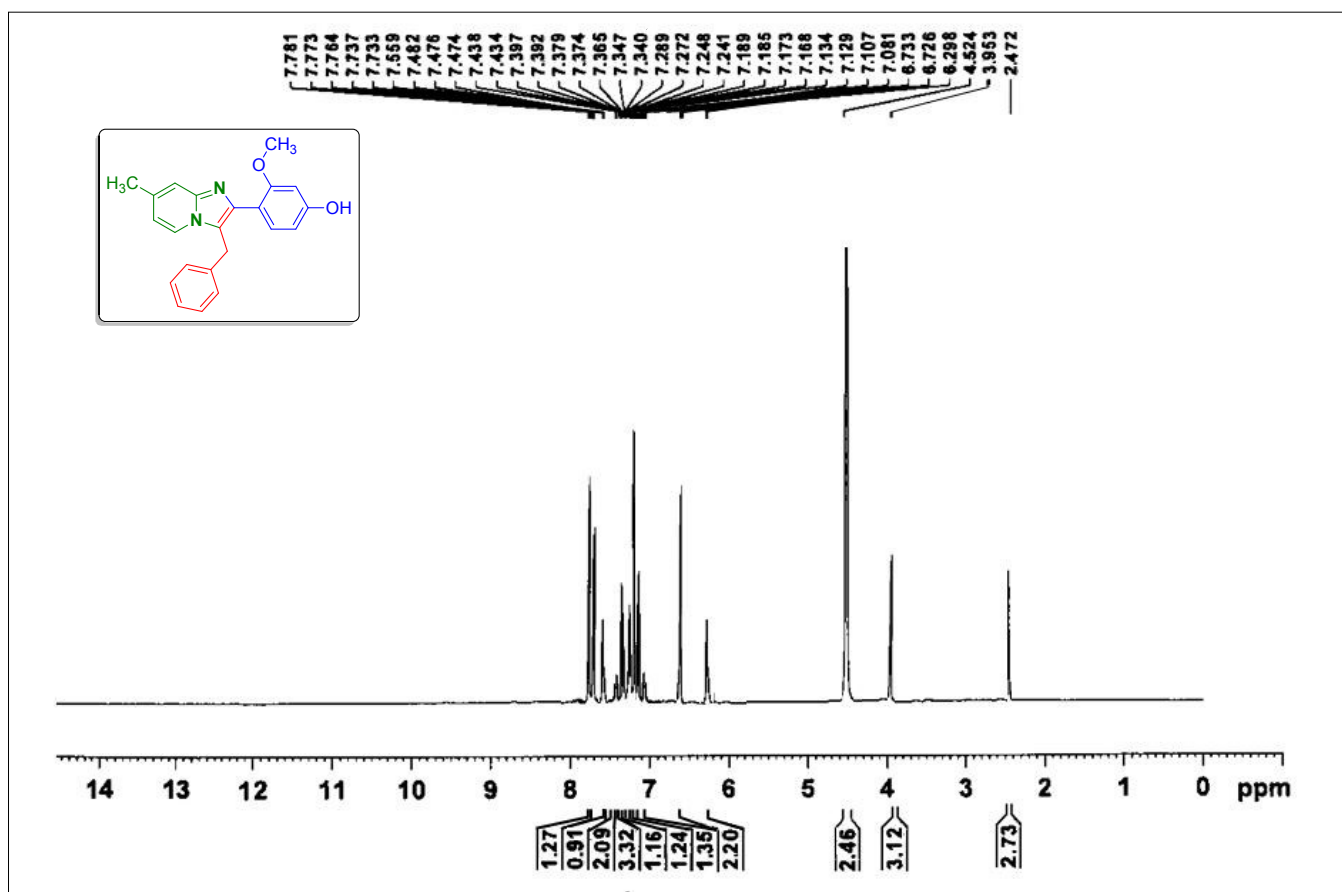

**Figure S22.** The  $^{13}\text{C}$  NMR Spectrum of 4-(3-benzyl-7-methylimidazo[1,2-a]pyridin-2-yl)-3-methoxyphenol (**4j**):

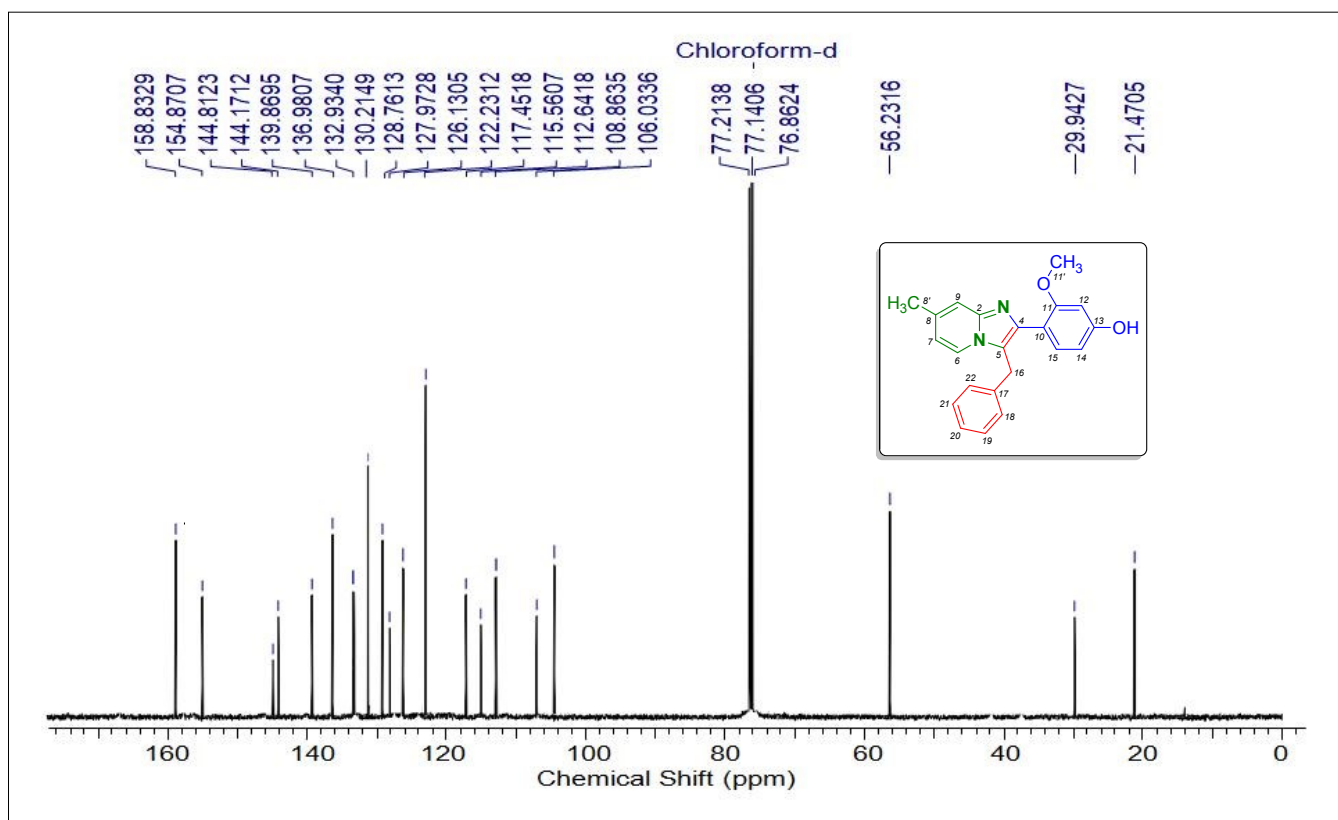

**Table S1. Ecoscale calculation for the reaction of 2-amino-4-methyl pyridine, 4-chlorobenzaldehyde and phenylacetylene, in the presence of PEG 400.**

| <b>EcoScale Penalty points</b> | <b>Details of Parameter</b>                      | <b>Penalty Points<sup>b</sup></b> |
|--------------------------------|--------------------------------------------------|-----------------------------------|
| 1. Yield                       |                                                  | 3                                 |
| 2. Cost of reactants           | 2-amino-4-methyl pyridine                        | 0                                 |
|                                | 4-chlorobenzaldehyde                             | 0                                 |
|                                | Phenyl acetylene                                 | 0                                 |
|                                | PEG 400                                          | 0                                 |
|                                | CoFe <sub>2</sub> O <sub>4</sub> -HMS            | 0                                 |
| 3. Safety <sup>a</sup>         | 2-amino-4-methyl pyridine (T)                    | 5                                 |
|                                | 4-chlorobenzaldehyde (T)                         | 5                                 |
|                                | Phenyl acetylene (F, T)                          | 10                                |
|                                | PEG 400                                          | 0                                 |
|                                | CoFe <sub>2</sub> O <sub>4</sub> -HMS            | 0                                 |
| 4. Technical setup             | Unconventional activation technique (Ultrasound) | 2                                 |
| 5. Temperature/time            | Room temperature, < 1h                           | 0                                 |
| 6. Workup and purification     | Adding solvent                                   | 0                                 |
| <b>Total Penalty points</b>    |                                                  | <b>25</b>                         |

<sup>a</sup>Based on the hazard warning symbols.

<sup>b</sup>The total of all penalties was 25, which gave a score of **75** (100 - 25), which is indicative of an excellent green synthesis.

**Table S2. Calculation of E-factor, mass intensity, atom economy, reaction mass efficiency and carbon efficiency for the reaction of 2-amino-4methyl pyridine, 4-chlorobenzaldehyde and phenyl acetylene, in the presence of PEG 400.**

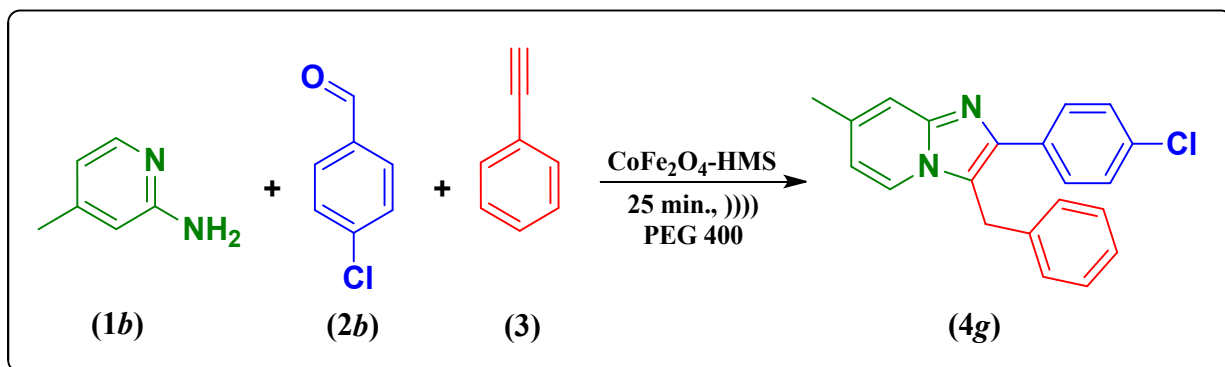

- **Total amount of reactants:** Reactant (1b) + Reactant (2b) + Reactant (3)  
 $= 0.1081\text{g} + 0.1405\text{g} + 0.1097\text{g} = \mathbf{0.3583\text{g}}$

- **Amount of final product (4g):**  $\mathbf{0.3354\text{g}}$

- **Amount of waste:**  $(0.3583\text{g} - 0.3354\text{g}) = \mathbf{0.0229\text{g}}$

$$E - \text{Factor} = \frac{\text{Amount of Waste}}{\text{Amount of Product}}$$

$$E - \text{Factor} = \frac{0.0229\text{g}}{0.3583\text{g}}$$

$$E - \text{Factor} = 0.0639$$

#### ❖ **Process Mass Intensity (PMI)**

$$\text{Process Mass Intensity} = \frac{\text{Amount of Waste} + \text{Amount of Product}}{\text{Amount of Product}}$$

$$\text{Process Mass Intensity} = E - \text{Factor} + 1$$

$$\text{Process Mass Intensity} = 1.0639$$

---

❖ **Atom Economy (AE)**

$$\text{Atom Economy} = \frac{\text{MW of desired Product}}{\Sigma \text{ of MW of stoichiometric reactants}} \times 100$$

$$\text{Atom Economy} = \frac{0.3354}{0.3583} \times 100$$

$$\text{Atom Economy} = 93.60 \%$$

❖ **Reaction Mass Efficiency**

$$\text{Reaction Mass Efficiency} = \frac{\text{Mass of desired Product}}{\Sigma \text{ of Mass of reactants}} \times 100$$

$$\text{Reaction Mass Efficiency} = \frac{332.8}{368.7} \times 100$$

$$\text{Reaction Mass Efficiency} = 90.26 \%$$

❖ **Carbon Efficiency (CE)**

$$\text{Carbon Efficiency} = \frac{\text{Amount of carbon in product}}{\text{Total carbon present in reactants}} \times 100$$

$$\text{Carbon Efficiency} = \frac{1.974}{2.665} \times 100$$

$$\text{Carbon Efficiency} = 74.07 \%$$

---

## References

1. Z. T. Bhutia, D. Das, A. Chatterjee, M. Banerjee, *ACS Omega*, 2019, **4**, 4481—4490.
2. A. Maleki, *Helv. Chim. Acta*, 2014, **97**, 587—593.
3. G. Purohit, A. Kharkwal, D.S. Rawat, *ACS Sustainable Chem. Eng.*, 2020, **8**, 5544—5557.
4. J. B. Bharate, S. K. Guru, S. K. Jain, S. Meena, P. P. Singh, S. Bhushan, B. Singh, S. B. Bharate, R. A. Vishwakarma, *RSC Adv.*, 2013, **3**, 20869—20876.
5. B. V. S. Reddy, P. S. Reddy, Y. J. Reddy, J. S. Yadav, *Tetrahedron Letters*, 2011, **52**, 5789—5793.
6. N. Chernyak, V. Gevorgyan, *Angew. Chem. Int. Ed.*, 2010, **49**, 2743—2746.
